# Supplementary material for: Associations of grip strength with cardiovascular, respiratory, and cancer outcomes and all cause mortality: prospective cohort study of half a million UK Biobank participants
Source: PubMed Central journal article supplement — BMJ. 2018 May 8;361:k1651. doi: 10.1136/bmj.k1651 (PMC5939721; doi:10.1136/bmj.k1651), 2018-05-08
Supplement: celc039411.ww1.pdf [file celc039411.ww1.pdf]

**SUPPLEMENTARY TABLES**

**Table A. Cut-off point for age and sex –specific grip strength (kg) quartile.**

| Sex   | Age group      | Q1 ( Lowest) | Q2    | Q3    | Q4 (Highest) |
|-------|----------------|--------------|-------|-------|--------------|
| Women | <56 years      | <21          | 21-25 | 26-29 | >29          |
|       | 56 to 65 years | <19          | 18-22 | 23-26 | >26          |
|       | >65 years      | <17          | 17-20 | 21-24 | >24          |
| Men   | <56 years      | <36          | 36-42 | 43-48 | >48          |
|       | 56 to 65 years | <33          | 33-38 | 39-44 | >44          |
|       | >65 years      | <31          | 31-36 | 37-41 | >41          |

**Table B. Grip strength (kg) cut-off points for weakness defined by the Foundation for the National Institutes of Health Sarcopenia Project.**

| Sex   | Normal | Weakness |
|-------|--------|----------|
| Women | ≥16    | <16      |
| Men   | ≥26    | ≥26      |

**Table C. Descriptive statistic of grip strength (kg) by age categories and sex.**

| Age categories | Women      | Men        |
|----------------|------------|------------|
| <45 years      | 26.8 (6.2) | 43.1 (9.3) |
| 45-49 years    | 25.9 (6.2) | 42.2 (9.1) |
| 50-54 years    | 24.4 (6.1) | 40.9 (8.8) |
| 55-59 years    | 23.0 (6.0) | 39.7 (8.5) |
| 60-64 years    | 21.8 (5.8) | 38.0 (8.2) |
| 65-69 years    | 20.6 (5.7) | 35.9 (7.9) |
| >70 years      | 19.9 (5.4) | 34.4 (7.8) |

Data presented as mean and (SD).

**Table D** Cohort descriptive characteristics by age-specific quartiles of grip strength in women

| <b>Socio-demographics</b>                                        | <b>Q4 (Highest)</b> | <b>Q3</b>         | <b>Q2</b>         | <b>Q1 ( Lowest)</b> |
|------------------------------------------------------------------|---------------------|-------------------|-------------------|---------------------|
| Total n                                                          | 62,777              | 65,338            | 65,943            | 66,005              |
| Age (years), mean (SD)                                           | 55.4 (8.4)          | 56.3 (8.0)        | 56.5 (7.8)        | 57.1 (7.7)          |
| Deprivation index, mean (SD)                                     | -1.6 (2.9)          | -1.5 (2.9)        | -1.4 (3.0)        | -1.0 (3.2)          |
| Deprivation index quintiles, % (n)                               |                     |                   |                   |                     |
| Lowest                                                           | 22.0 (13,781)       | 21.2 (13,763)     | 20.3 (13,401)     | 17.6 (11,638)       |
| Lower-Middle                                                     | 20.9 (13,103)       | 21.0 (13,744)     | 10.0 (13,215)     | 18.7 (12,381)       |
| Middle                                                           | 20.6 (12,949)       | 20.7 (13,498)     | 20.6 (13,524)     | 19.7 (12,972)       |
| Middle-Higher                                                    | 19.7 (12,365)       | 19.9 (13,027)     | 20.2 (13,324)     | 21.1 (13,897)       |
| Highest                                                          | 16.8 (10,579)       | 17.3 (11,306)     | 18.9 (12,479)     | 22.9 (15,117)       |
| Ethnicity, % (n) ‡                                               |                     |                   |                   |                     |
| Whites                                                           | 96.1 (60,103)       | 95.9 (62,525)     | 95.2 (62,622)     | 92.4 (60,805)       |
| Mixed background                                                 | 1.3 (839)           | 1.4 (904)         | 1.5 (996)         | 2.0 (1,341)         |
| South Asians                                                     | 0.4 (276)           | 0.9 (590)         | 1.5 (999)         | 3.5 (2,274)         |
| Blacks                                                           | 2.0 (1,277)         | 1.5 (964)         | 1.4 (944)         | 1.6 (1,060)         |
| Chinese                                                          | 0.2 (126)           | 0.3 (204)         | 0.4 (245)         | 0.5 (312)           |
| Smoking status, % (n)                                            |                     |                   |                   |                     |
| Never                                                            | 58.5 (36,731)       | 59.4 (38,819)     | 60.4 (39,858)     | 60.6 (39,981)       |
| Previous                                                         | 32.7 (20,542)       | 32.0 (20,875)     | 31.1 (20,497)     | 30.2 (19,898)       |
| Current                                                          | 8.8 (5,504)         | 8.6 (5,644)       | 8.5 (5,588)       | 9.2 (6,126)         |
| <b>Obesity-related markers</b>                                   |                     |                   |                   |                     |
| Height (m), mean (SD)                                            | 1.6 (0.1)           | 1.6 (0.1)         | 1.6 (0.1)         | 1.6 (0.1)           |
| BMI, mean (SD)                                                   | 27.0 (5.1)          | 26.8 (5.0)        | 26.9 (5.1)        | 27.5 (5.5)          |
| BMI Categories, % (n)                                            |                     |                   |                   |                     |
| Underweight (<18.5 kg.m <sup>-2</sup> )                          | 0.5 (311)           | 0.7 (483)         | 0.8 (538)         | 1.0 (632)           |
| Normal weight (18.5-<25.0 kg.m <sup>-2</sup> )                   | 39.9 (25,007)       | 41.1 (26,792)     | 40.3 (26,543)     | 35.7 (23,544)       |
| Overweight (25.0 to <30.0 kg.m <sup>-2</sup> )                   | 37.1 (23,308)       | 36.9 (24,124)     | 36.5 (24,082)     | 36.4 (24,016)       |
| Obese (≥30.0 kg.m <sup>-2</sup> )                                | 22.5 (14,151)       | 21.3 (13,939)     | 22.4 (14,780)     | 27.0 (17,813)       |
| Waist Circumference (cm), mean (SD)                              | 84.4 (12.3)         | 83.9 (12.1)       | 84.2 (12.4)       | 85.9 (13.1)         |
| Central Obesity, n (%)                                           | 35.2 (22,114)       | 33.8 (22,085)     | 34.7 (22,903)     | 40.4 (26,658)       |
| % Body fat, mean (SD)                                            | 36.0 (6.9)          | 36.2 (6.8)        | 36.5 (6.8)        | 37.4 (7.0)          |
| <b>Physical activity</b>                                         |                     |                   |                   |                     |
| Grip strength (kg), mean (SD)                                    | 30.9 (3.5)          | 25.4 (2.2)        | 21.7 (2.0)        | 15.7 (3.8)          |
| Total physical activity (MET.min.week <sup>-1</sup> ), mean (SD) | 2,799.6 (2,799.0)   | 2,684.1 (2,746.9) | 2,625.3 (2,743.9) | 2,505.6 (2,683.1)   |
| TV viewing (h.day <sup>-1</sup> )                                | 2.6 (1.5)           | 2.7 (1.5)         | 2.8 (1.6)         | 3.0 (1.7)           |
| Total Discretionary sedentary behaviour (h.day <sup>-1</sup> )   | 4.6 (2.0)           | 4.6 (2.0)         | 4.7 (2.0)         | 4.8 (2.2)           |
| <b>Dietary intakes</b>                                           |                     |                   |                   |                     |
| Total energy intake (Kcal.day <sup>-1</sup> ) †                  | 2,052 (604)         | 2,019 (583)       | 2,002 (586)       | 1987 (608)          |
| Protein intake (% of TE) †                                       | 15.9 (3.6)          | 15.9 (3.7)        | 15.9 (3.7)        | 15.9 (3.8)          |
| Total fat intake (% of TE) †                                     | 32.5 (6.7)          | 32.2 (6.7)        | 32.3 (6.8)        | 32.2 (6.9)          |
| Saturated fat intake (% of TE) †                                 | 12.4 (3.3)          | 12.3 (3.3)        | 12.3 (3.3)        | 12.3 (3.4)          |
| Carbohydrate intake (% of TE) †                                  | 47.3 (8.0)          | 47.6 (8.0)        | 47.7 (8.1)        | 48.1 (8.2)          |
| Sugar intake (% of TE) †                                         | 23.1 (6.9)          | 23.2 (7.0)        | 23.2 (7.1)        | 23.4 (7.4)          |
| Alcohol intake (% of TE), mean (SD) †                            | 4.4 (5.6)           | 4.3 (5.6)         | 4.1 (5.5)         | 3.8 (5.4)           |
| F&V intake (g.day <sup>-1</sup> ), mean (SD)                     | 359.1 (189.3)       | 354.5 (188.9)     | 348.6 (187.3)     | 346.5 (197.6)       |
| Processed meat intake (portion.day <sup>-1</sup> ), mean (SD)    | 1.6 (1.0)           | 1.6 (1.0)         | 1.6 (1.0)         | 1.6 (1.0)           |
| Red meat intake (portion.day <sup>-1</sup> ), mean (SD)          | 2.0 (1.4)           | 2.0 (1.3)         | 2.0 (1.4)         | 2.0 (1.4)           |
| Oily fish intake (portion.day <sup>-1</sup> ), mean (SD)         | 1.2 (1.0)           | 1.1 (1.0)         | 1.1 (1.0)         | 1.1 (1.0)           |
| <b>Health status, n (%)</b>                                      |                     |                   |                   |                     |
| Diabetes history                                                 | 2.7 (1,700)         | 3.1 (2,007)       | 3.6 (2,397)       | 5.6 (3,709)         |
| Cancer history                                                   | 8.0 (5,017)         | 8.7 (5,699)       | 9.1 (5,975)       | 10.2 (6,706)        |
| Long standing illness                                            | 23.4 (14,702)       | 25.7 (16,795)     | 29.0 (19,090)     | 41.1 (27,121)       |
| CVD                                                              | 23.2 (14,540)       | 23.9 (15,631)     | 25.0 (16,491)     | 29.4 (19,429)       |
| Depression history                                               | 5.5 (3,427)         | 6.1 (4,011)       | 7.0 (4,606)       | 8.5 (5,577)         |
| Hypertension                                                     | 21.0 (13,198)       | 21.4 (13,953)     | 21.8 (14,378)     | 24.0 (15,854)       |

Data presented as mean (SD) or % (n) for continuous and categorical variables as appropriate. CVD: cardiovascular disease; TE: total energy intake; SD: standard deviation; TV: television; BMI: body mass index; MET: metabolic equivalent.

‡ 1527 participants reported to be from “other” or a “mixed ethnic” background. †Data for nutrient intakes were available for a subset of 211 064 participants. **Cut-off points for age- and sex-specific quartiles of grip strength are presented in Table A.**

**Table E** Cohort descriptive characteristics by age-specific quartiles of grip strength in men

| <b>Socio-demographics</b>                                        | <b>Q4 (Highest)</b> | <b>Q3</b>         | <b>Q2</b>         | <b>Q1 ( Lowest)</b> |
|------------------------------------------------------------------|---------------------|-------------------|-------------------|---------------------|
| Total n                                                          | 50,400              | 55,397            | 55,496            | 55,718              |
| Age (years), mean (SD)                                           | 56.2 (8.3)          | 56.8 (8.1)        | 56.9 (8.3)        | 57.1 (8.0)          |
| Deprivation index, mean (SD)                                     | -1.8 (2.9)          | -1.6 (3.0)        | -1.3 (3.1)        | -0.6 (3.4)          |
| Deprivation index quintiles, % (n)                               |                     |                   |                   |                     |
| Lowest                                                           | 23.8 (11,968)       | 22.0 (12,168)     | 20.4 (11,313)     | 16.2 (9,050)        |
| Lower-Middle                                                     | 22.5 (11,355)       | 21.2 (11,760)     | 20.3 (11,262)     | 17.0 (9,443)        |
| Middle                                                           | 20.3 (10,241)       | 20.6 (11,387)     | 19.9 (11,068)     | 18.5 (10,301)       |
| Middle-Higher                                                    | 18.4 (9,247)        | 10.0 (10,524)     | 19.7 (10,924)     | 21.2 (11,813)       |
| Highest                                                          | 15.0 (7,589)        | 17.2 (9,558)      | 29.7 (10,929)     | 27.1 (15,111)       |
| Ethnicity, % (n) †                                               |                     |                   |                   |                     |
| Whites                                                           | 96.8 (48,614)       | 96.4 (53,200)     | 95.3 (52,681)     | 91.3 (50,596)       |
| Mixed background                                                 | 1.0 (485)           | 1.1 (592)         | 1.2 (668)         | 1.9 (1,026)         |
| South Asians                                                     | 0.6 (304)           | 1.1 (627)         | 2.0 (1,094)       | 4.8 (2,665)         |
| Blacks                                                           | 1.5 (775)           | 1.2 (676)         | 1.2 (686)         | 1.6 (928)           |
| Chinese                                                          | 0.1 (48)            | 0.2 (105)         | 0.3 (151)         | 0.4 (221)           |
| Smoking status, % (n)                                            |                     |                   |                   |                     |
| Never                                                            | 49.1 (24,724)       | 49.0 (27,162)     | 49.4 (27,414)     | 49.5 (27,563)       |
| Previous                                                         | 39.7 (20,020)       | 39.2 (21,696)     | 38.5 (21,377)     | 36.9 (20,562)       |
| Current                                                          | 11.2 (5,656)        | 11.8 (6,539)      | 12.1 (6,705)      | 13.6 (7,593)        |
| <b>Obesity-related markers</b>                                   |                     |                   |                   |                     |
| Height (m), mean (SD)                                            | 1.8 (0.1)           | 1.8 (0.1)         | 1.7 (0.1)         | 1.7 (0.1)           |
| BMI, mean (SD)                                                   | 28.1 (3.9)          | 27.7 (4.0)        | 27.6 (4.2)        | 27.8 (4.6)          |
| BMI Categories, n (%)                                            |                     |                   |                   |                     |
| Underweight (<18.5 kg.m <sup>-2</sup> )                          | 0.1 (23)            | 0.1 (52)          | 0.2 (133)         | 0.5 (310)           |
| Normal weight (18.5-<25.0 kg.m <sup>-2</sup> )                   | 20.3 (10,230)       | 24.9 (13,792)     | 27.3 (15,155)     | 27.4 (15,251)       |
| Overweight (25.0 to <30.0 kg.m <sup>-2</sup> )                   | 52.5 (26,501)       | 50.9 (28,190)     | 48.9 (27,106)     | 45.7 (25,443)       |
| Obese (≥30.0 kg.m <sup>-2</sup> )                                | 27.1 (13,646)       | 24.1 (13,363)     | 23.6 (13,102)     | 26.4 (14,714)       |
| Waist Circumference (cm), mean (SD)                              | 97.3 (10.7)         | 96.5 (10.9)       | 96.4 (11.3)       | 97.3 (12.2)         |
| Central Obesity, % (n)                                           | 31.0 (15,642)       | 29.0 (16,055)     | 28.7 (15,936)     | 32.5 (18,124)       |
| % Body fat, mean (SD)                                            | 24.8 (5.5)          | 25.0 (5.7)        | 25.2 (5.8)        | 26.0 (6.1)          |
| <b>Physical activity</b>                                         |                     |                   |                   |                     |
| Grip strength (kg), mean (SD)                                    | 50.4 (5.1)          | 42.5 (2.9)        | 37.1 (2.7)        | 28.7 (5.2)          |
| Total physical activity (MET.min.week <sup>-1</sup> ), mean (SD) | 3,248.3 (2,410.8)   | 3,146.6 (3,361.8) | 3,052.2 (3,331.6) | 2,838.5 (3,283.6)   |
| TV viewing (h.day <sup>-1</sup> )                                | 2.7 (1.5)           | 2.7 (1.5)         | 2.8 (1.6)         | 3.0 (1.8)           |
| Total Discretionary sedentary behaviour (h.day <sup>-1</sup> )   | 5.5 (2.4)           | 5.4 (2.4)         | 5.4 (2.4)         | 5.4 (2.6)           |
| <b>Dietary intakes</b>                                           |                     |                   |                   |                     |
| Total energy intake (Kcal.day <sup>-1</sup> ) †                  | 2,388 (700)         | 2,352 (692)       | 2,336 (698)       | 2,320 (725)         |
| Protein intake (% of TE) †                                       | 15.2 (3.4)          | 15.2 (3.4)        | 15.1 (3.4)        | 15.1 (3.6)          |
| Total fat intake (% of TE) †                                     | 31.9 (6.6)          | 31.7 (6.6)        | 31.7 (6.7)        | 31.7 (6.8)          |
| Saturated fat intake (% of TE) †                                 | 12.3 (3.3)          | 12.2 (3.3)        | 12.2 (3.4)        | 12.2 (3.4)          |
| Carbohydrate intake (% of TE) †                                  | 46.3 (8.1)          | 46.5 (8.1)        | 46.7 (8.2)        | 47.1 (8.5)          |
| Sugar intake (% of TE) †                                         | 21.6 (6.6)          | 21.6 (6.7)        | 21.6 (6.8)        | 21.8 (7.2)          |
| Alcohol intake (% of TE), mean (SD) †                            | 6.6 (7.2)           | 6.6 (7.3)         | 6.5 (7.4)         | 6.1 (7.5)           |
| F&V intake (g.day <sup>-1</sup> ), mean (SD)                     | 307.7 (188.6)       | 306.3 (192.6)     | 301.4 (193.4)     | 298.9 (211.8)       |
| Processed meat intake (portion.day <sup>-1</sup> ), mean (SD)    | 2.2 (1.0)           | 2.2 (1.0)         | 2.2 (1.0)         | 2.2 (1.1)           |
| Red meat intake (portion.day <sup>-1</sup> ), mean (SD)          | 2.3 (1.5)           | 2.3 (1.5)         | 2.3 (1.5)         | 2.3 (1.6)           |
| Oily fish intake (portion.day <sup>-1</sup> ), mean (SD)         | 1.1 (1.1)           | 1.1 (1.1)         | 1.1 (1.1)         | 1.1 (1.1)           |
| <b>Health status, % (n)</b>                                      |                     |                   |                   |                     |
| Diabetes history                                                 | 4.6 (2,310)         | 5.6 (3,119)       | 6.8 (3,788)       | 10.6 (5,881)        |
| Cancer history                                                   | 5.7 (2,894)         | 5.8 (3,226)       | 6.2 (3,445)       | 6.5 (3,602)         |
| Long standing illness                                            | 29.3 (14,789)       | 32.2 (17,815)     | 34.9 (19,388)     | 44.3 (24,682)       |
| CVD                                                              | 31.3 (15,756)       | 32.6 (18,035)     | 34.1 (18,943)     | 38.6 (21,532)       |
| Depression history                                               | 3.1 (1,577)         | 3.8 (2,079)       | 4.1 (2,273)       | 5.5 (3,066)         |
| Hypertension                                                     | 24.9 (12,547)       | 25.1 (13,883)     | 25.6 (14,218)     | 27.2 (15,160)       |

Data presented as mean (SD) or % (n) for continuous and categorical variables as appropriate. CVD: cardiovascular disease; TE: total energy intake; SD: standard deviation; TV: television; BMI: body mass index; MET: metabolic equivalent. †Data for nutrients intake were available for a subset of 211,064 participants. ‡ **1527 participants reported to be from “other” or a “mixed ethnic” background. Cut-off points for age- and sex-specific quartiles of grip strength are presented in Table A.**

**Table F.** Association of grip strength with all- and cause-specific mortality in women and men

|                           | Women   |                  |                                          |         | Men     |                  |                                          |         |
|---------------------------|---------|------------------|------------------------------------------|---------|---------|------------------|------------------------------------------|---------|
|                           | Total N | Number of deaths | HR (95% CI) by 5-kg lower grip strength. | P-value | Total N | Number of deaths | HR (95% CI) by 5-kg lower grip strength. | P-value |
| <b>All-cause</b>          |         |                  |                                          |         |         |                  |                                          |         |
| Model 0                   | 260,063 | 5,231            | 1.27 (1.24 to 1.29)                      | <0.001  | 217,011 | 8,091            | 1.21 (1.20 to 1.23)                      | <0.001  |
| Model 1                   | 260,063 | 5,231            | 1.29 (1.26 to 1.31)                      | <0.001  | 217,011 | 8,091            | 1.22 (1.21 to 1.24)                      | <0.001  |
| Model 2                   | 260,063 | 5,231            | 1.21 (1.18 to 1.24)                      | <0.001  | 217,011 | 8,091            | 1.19 (1.17 to 1.20)                      | <0.001  |
| Model 3                   | 260,063 | 5,231            | 1.19 (1.17 to 1.22)                      | <0.001  | 217,011 | 8,091            | 1.18 (1.16 to 1.19)                      | <0.001  |
| Model 4                   | 259,240 | 4,408            | 1.20 (1.17 to 1.23)                      | <0.001  | 215,523 | 6,603            | 1.16 (1.15 to 1.17)                      | <0.001  |
| <b>CVD</b>                |         |                  |                                          |         |         |                  |                                          |         |
| Model 0                   | 251,355 | 996              | 1.28 (1.22 to 1.36)                      | <0.001  | 198,553 | 2,037            | 1.26 (1.23 to 1.30)                      | <0.001  |
| Model 1                   | 251,355 | 996              | 1.29 (1.23 to 1.36)                      | <0.001  | 198,553 | 2,037            | 1.28 (1.24 to 1.31)                      | <0.001  |
| Model 2                   | 251,355 | 996              | 1.20 (1.14 to 1.27)                      | <0.001  | 198,553 | 2,037            | 1.24 (1.20 to 1.27)                      | <0.001  |
| Model 3                   | 251,355 | 996              | 1.18 (1.12 to 1.25)                      | <0.001  | 198,553 | 2,037            | 1.23 (1.20 to 1.27)                      | <0.001  |
| Model 4                   | 250,624 | 832              | 1.19 (1.13 to 1.25)                      | <0.001  | 197,420 | 1,685            | 1.22 (1.18 to 1.26)                      | <0.001  |
| <b>Respiratory System</b> |         |                  |                                          |         |         |                  |                                          |         |
| Model 0                   | 256,312 | 690              | 1.47 (1.37 to 1.56)                      | <0.001  | 213,065 | 1,372            | 1.34 (1.30 to 1.38)                      | <0.001  |
| Model 1                   | 256,312 | 690              | 1.48 (1.39 to 1.57)                      | <0.001  | 213,065 | 1,372            | 1.33 (1.29 to 1.37)                      | <0.001  |
| Model 2                   | 256,312 | 690              | 1.35 (1.27 to 1.43)                      | <0.001  | 213,065 | 1,372            | 1.27 (1.23 to 1.32)                      | <0.001  |
| Model 3                   | 256,312 | 690              | 1.32 (1.25 to 1.41)                      | <0.001  | 213,065 | 1,372            | 1.26 (1.22 to 1.30)                      | <0.001  |
| Model 4                   | 255,537 | 603              | 1.31 (1.22 to 1.40)                      | <0.001  | 211,695 | 1,159            | 1.24 (1.20 to 1.28)                      | <0.001  |
| <b>COPD</b>               |         |                  |                                          |         |         |                  |                                          |         |
| Model 0                   | 256,312 | 100              | 1.55 (1.29 to 1.78)                      | <0.001  | 213,065 | 230              | 1.35 (1.17 to 1.21)                      | <0.001  |
| Model 1                   | 256,312 | 100              | 1.52 (1.30 to 1.78)                      | <0.001  | 213,065 | 230              | 1.33 (1.23 to 1.44)                      | <0.001  |
| Model 2                   | 256,312 | 100              | 1.33 (1.13 to 1.55)                      | <0.001  | 213,065 | 230              | 1.26 (1.16 to 1.36)                      | <0.001  |
| Model 3                   | 256,312 | 100              | 1.26 (1.07 to 1.48)                      | 0.005   | 213,065 | 230              | 1.23 (1.14 to 1.33)                      | <0.001  |
| Model 4                   | 255,537 | 89               | 1.24 (1.05 to 1.47)                      | 0.01    | 211,695 | 196              | 1.19 (1.09 to 1.30)                      | <0.001  |
| <b>All cancer</b>         |         |                  |                                          |         |         |                  |                                          |         |
| Model 0                   | 236,666 | 2,380            | 1.15 (1.11 to 1.18)                      | <0.001  | 203,844 | 3,358            | 1.10 (1.07 to 1.15)                      | <0.001  |
| Model 1                   | 236,666 | 2,380            | 1.18 (1.14 to 1.22)                      | <0.001  | 203,844 | 3,358            | 1.12 (1.10 to 1.15)                      | <0.001  |
| Model 2                   | 236,666 | 2,380            | 1.16 (1.12 to 1.20)                      | <0.001  | 203,844 | 3,358            | 1.11 (1.08 to 1.13)                      | <0.001  |
| Model 3                   | 236,666 | 2,380            | 1.15 (1.11 to 1.19)                      | <0.001  | 203,844 | 3,358            | 1.10 (1.08 to 1.13)                      | <0.001  |
| Model 4                   | 236,187 | 2,113            | 1.17 (1.13 to 1.21)                      | <0.001  | 202,776 | 2,920            | 1.10 (1.07 to 1.13)                      | <0.001  |

| <b>Colorectal cancer</b>         |         |     |                     |        |         |     |                     |        |
|----------------------------------|---------|-----|---------------------|--------|---------|-----|---------------------|--------|
| Model 0                          | 236,666 | 225 | 1.14 (1.02 to 1.26) | 0.02   | 203,844 | 336 | 1.14 (1.06 to 1.22) | <0.001 |
| Model 1                          | 236,666 | 225 | 1.19 (1.06 to 1.33) | 0.002  | 203,844 | 336 | 1.17 (1.09 to 1.26) | <0.001 |
| Model 2                          | 236,666 | 225 | 1.18 (1.05 to 1.32) | 0.004  | 203,844 | 336 | 1.17 (1.09 to 1.26) | <0.001 |
| Model 3                          | 236,666 | 225 | 1.18 (1.05 to 1.32) | 0.005  | 203,844 | 336 | 1.18 (1.10 to 1.27) | <0.001 |
| Model 4                          | 236,187 | 206 | 1.17 (1.04 to 1.32) | 0.001  | 202,776 | 295 | 1.18 (1.09 to 1.27) | <0.001 |
| <b>Lung cancer</b>               |         |     |                     |        |         |     |                     |        |
| Model 0                          | 236,666 | 501 | 1.16 (1.08 to 1.24) | <0.001 | 203,844 | 716 | 1.08 (1.03 to 1.13) | 0.001  |
| Model 1                          | 236,666 | 501 | 1.16 (1.08 to 1.25) | <0.001 | 203,844 | 716 | 1.09 (1.04 to 1.15) | <0.001 |
| Model 2                          | 236,666 | 501 | 1.13 (1.05 to 1.22) | 0.001  | 203,844 | 716 | 1.08 (1.02 to 1.13) | 0.004  |
| Model 3                          | 236,666 | 501 | 1.13 (1.05 to 1.22) | 0.001  | 203,844 | 716 | 1.07 (1.02 to 1.12) | 0.009  |
| Model 4                          | 236,187 | 428 | 1.17 (1.07 to 1.27) | <0.001 | 202,776 | 614 | 1.08 (1.03 to 1.13) | 0.001  |
| <b>Breast / Prostate cancer*</b> |         |     |                     |        |         |     |                     |        |
| Model 0                          | 236,666 | 204 | 1.19 (1.06 to 1.32) | <0.001 | 203,844 | 254 | 1.03 (0.94 to 1.11) | 0.58   |
| Model 1                          | 236,666 | 204 | 1.24 (1.11 to 1.39) | <0.001 | 203,844 | 254 | 1.06 (0.97 to 1.15) | 0.21   |
| Model 2                          | 236,666 | 204 | 1.22 (1.09 to 1.37) | 0.001  | 203,844 | 254 | 1.06 (0.97 to 1.16) | 0.17   |
| Model 3                          | 236,666 | 204 | 1.22 (1.09 to 1.37) | 0.001  | 203,844 | 254 | 1.06 (0.97 to 1.15) | 0.20   |
| Model 4                          | 236,187 | 191 | 1.24 (1.10 to 1.39) | <0.001 | 202,776 | 238 | 1.05 (0.96 to 1.15) | 0.29   |

Data presented as adjusted hazard ratio (HR) and its 95% confidence interval (95% CI) by 5-kg lower grip strength.

Model 0 was adjusted for, age, education qualifications, deprivation index, ethnicity and month of recruitment.

Model 1 was adjusted as in model 0 and for height

Model 2 was adjusted as in model 1 and for depression, diabetes, hypertension, respiratory disease, CVD, cancer and long-standing illness

Model 3 was adjusted as in model 2 and for BMI categories, smoking, physical activity, discretionary sedentary behaviour, dietary intake (alcohol, fruit and vegetable, oily fish, red meat and processed meat intake).

Model 4 was adjusted as in model 3 but participants who had events within the first 2 years of follow up were excluded from the analysis.

\*Hazard ratios estimated for Breast cancer for women and Prostate cancer for men.

**Table G.** Association of grip strength with cause-specific incidence in women and men

|                           | Women   |                  |                                         |         | Men     |                  |                                         |         |
|---------------------------|---------|------------------|-----------------------------------------|---------|---------|------------------|-----------------------------------------|---------|
|                           | Total N | Number of events | HR (95% CI) by 5-kg lower grip strength | P-value | Total N | Number of events | HR (95% CI) by 5-kg lower grip strength | P-value |
| <b>CVD</b>                |         |                  |                                         |         |         |                  |                                         |         |
| Model 0                   | 251,355 | 11,371           | 1.16 (1.14 to 1.18)                     | <0.001  | 198,553 | 16,688           | 1.10 (1.09 to 1.12)                     | <0.001  |
| Model 1                   | 251,355 | 11,371           | 1.20 (1.18 to 1.22)                     | <0.001  | 198,553 | 16,688           | 1.13 (1.11 to 1.14)                     | <0.001  |
| Model 2                   | 251,355 | 11,371           | 1.15 (1.14 to 1.17)                     | <0.001  | 198,553 | 16,688           | 1.11 (1.10 to 1.12)                     | <0.001  |
| Model 3                   | 251,355 | 11,371           | 1.15 (1.13 to 1.16)                     | <0.001  | 198,553 | 16,688           | 1.11 (1.10 to 1.12)                     | <0.001  |
| Model 4                   | 250,624 | 11,157           | 1.15 (1.13 to 1.17)                     | <0.001  | 197,420 | 16,275           | 1.11 (1.10 to 1.12)                     | <0.001  |
| <b>Respiratory System</b> |         |                  |                                         |         |         |                  |                                         |         |
| Model 0                   | 256,312 | 4,947            | 1.32 (1.29 to 1.35)                     | <0.001  | 213,065 | 5,595            | 1.23 (1.21 to 1.25)                     | <0.001  |
| Model 1                   | 256,312 | 4,947            | 1.33 (1.31 to 1.37)                     | <0.001  | 213,065 | 5,595            | 1.23 (1.21 to 1.26)                     | <0.001  |
| Model 2                   | 256,312 | 4,947            | 1.24 (1.21 to 1.26)                     | <0.001  | 213,065 | 5,595            | 1.19 (1.17 to 1.21)                     | <0.001  |
| Model 3                   | 256,312 | 4,947            | 1.22 (1.19 to 1.25)                     | <0.001  | 213,065 | 5,595            | 1.18 (1.16 to 1.20)                     | <0.001  |
| Model 4                   | 255,537 | 4,810            | 1.22 (1.19 to 1.25)                     | <0.001  | 211,695 | 5,295            | 1.17 (1.15 to 1.19)                     | <0.001  |
| <b>COPD</b>               |         |                  |                                         |         |         |                  |                                         |         |
| Model 0                   | 256,312 | 485              | 1.45 (1.35 to 1.55)                     | <0.001  | 213,065 | 646              | 1.27 (1.21 to 1.32)                     | <0.001  |
| Model 1                   | 256,312 | 485              | 1.41 (1.31 to 1.51)                     | <0.001  | 213,065 | 646              | 1.25 (1.19 to 1.31)                     | <0.001  |
| Model 2                   | 256,312 | 485              | 1.24 (1.15 to 1.33)                     | <0.001  | 213,065 | 646              | 1.18 (1.12 to 1.24)                     | <0.001  |
| Model 3                   | 256,312 | 485              | 1.20 (1.12 to 1.29)                     | <0.001  | 213,065 | 646              | 1.16 (1.11 to 1.22)                     | <0.001  |
| Model 4                   | 255,537 | 473              | 1.20 (1.12 to 1.29)                     | <0.001  | 211,695 | 604              | 1.15 (1.09 to 1.21)                     | <0.001  |
| <b>All cancer</b>         |         |                  |                                         |         |         |                  |                                         |         |
| Model 0                   | 236,666 | 13,502           | 1.08 (1.06 to 1.09)                     | <0.001  | 203,844 | 14,202           | 1.05 (1.04 to 1.06)                     | <0.001  |
| Model 1                   | 236,666 | 13,502           | 1.11 (1.09 to 1.12)                     | <0.001  | 203,844 | 14,202           | 1.07 (1.06 to 1.08)                     | <0.001  |
| Model 2                   | 236,666 | 13,502           | 1.10 (1.09 to 1.12)                     | <0.001  | 203,844 | 14,202           | 1.06 (1.05 to 1.08)                     | <0.001  |
| Model 3                   | 236,666 | 13,502           | 1.10 (1.09 to 1.12)                     | <0.001  | 203,844 | 14,202           | 1.07 (1.05 to 1.08)                     | <0.001  |
| Model 4                   | 236,187 | 13,229           | 1.10 (1.09 to 1.11)                     | <0.001  | 202,776 | 13,754           | 1.06 (1.05 to 1.07)                     | <0.001  |
| <b>Colorectal cancer</b>  |         |                  |                                         |         |         |                  |                                         |         |
| Model 0                   | 236,666 | 1,083            | 1.05 (1.01 to 1.10)                     | 0.04    | 203,844 | 1,528            | 1.06 (1.03 to 1.10)                     | <0.001  |
| Model 1                   | 236,666 | 1,083            | 1.08 (1.03 to 1.13)                     | 0.004   | 203,844 | 1,528            | 1.07 (1.04 to 1.11)                     | <0.001  |
| Model 2                   | 236,666 | 1,083            | 1.09 (1.03 to 1.14)                     | 0.002   | 203,844 | 1,528            | 1.08 (1.04 to 1.11)                     | <0.001  |
| Model 3                   | 236,666 | 1,083            | 1.08 (1.03 to 1.14)                     | 0.003   | 203,844 | 1,528            | 1.08 (1.05 to 1.12)                     | <0.001  |
| Model 4                   | 236,187 | 1,062            | 1.08 (1.02 to 1.14)                     | 0.007   | 202,776 | 1,478            | 1.08 (1.05 to 1.11)                     | <0.001  |

| <b>Lung cancer</b>                       |         |       |                     |        |         |       |                     |        |
|------------------------------------------|---------|-------|---------------------|--------|---------|-------|---------------------|--------|
| Model 0                                  | 236,666 | 779   | 1.16 (1.08 to 1.24) | <0.001 | 203,844 | 962   | 1.08 (1.03 to 1.13) | 0.001  |
| Model 1                                  | 236,666 | 779   | 1.17 (1.10 to 1.24) | <0.001 | 203,844 | 962   | 1.09 (1.04 to 1.13) | <0.001 |
| Model 2                                  | 236,666 | 779   | 1.13 (1.07 to 1.20) | <0.001 | 203,844 | 962   | 1.07 (1.03 to 1.12) | 0.002  |
| Model 3                                  | 236,666 | 779   | 1.13 (1.07 to 1.20) | <0.001 | 203,844 | 962   | 1.06 (1.02 to 1.11) | 0.005  |
| Model 4                                  | 236,187 | 704   | 1.15 (1.08 to 1.23) | <0.001 | 202,776 | 852   | 1.08 (1.03 to 1.13) | 0.001  |
| <b>Breast /<br/>Prostate<br/>cancer*</b> |         |       |                     |        |         |       |                     |        |
| Model 0                                  | 236,666 | 4,352 | 1.05 (1.02 to 1.08) | <0.001 | 203,844 | 3,249 | 1.01 (1.00 to 1.03) | 0.04   |
| Model 1                                  | 236,666 | 4,352 | 1.09 (1.06 to 1.12) | <0.001 | 203,844 | 3,249 | 1.03 (1.00 to 1.05) | 0.03   |
| Model 2                                  | 236,666 | 4,352 | 1.09 (1.06 to 1.12) | <0.001 | 203,844 | 3,249 | 1.03 (1.01 to 1.06) | 0.01   |
| Model 3                                  | 236,666 | 4,352 | 1.09 (1.06 to 1.12) | <0.001 | 203,844 | 3,249 | 1.04 (1.01 to 1.06) | 0.005  |
| Model 4                                  | 236,187 | 4,337 | 1.09 (1.06 to 1.12) | <0.001 | 202,776 | 3,229 | 1.04 (1.01 to 1.07) | 0.008  |

Data presented as adjusted hazard ratio (HR) and its 95% confidence interval (95% CI) by 5-kg lower grip strength.

Model 0 was adjusted for, age, education qualifications, deprivation index, ethnicity and month of recruitment.

Model 1 was adjusted as in model 0 and for height

Model 2 was adjusted as in model 1 and for depression, diabetes, hypertension, respiratory disease, CVD, cancer and long-standing illness

Model 3 was adjusted as in model 2 and for BMI categories, smoking, physical activity, discretionary sedentary behaviour, dietary intake (alcohol, fruit and vegetable, oily fish, red meat and processed meat intake).

Model 4 was adjusted as in model 3 but participants who had events within the first 2 years of follow up were excluded from the analysis.

\*Hazard ratios estimated for Breast cancer for women and Prostate cancer for men.

**Table H.** Association of quartiles of grip strength with all- and cause-specific mortality in women.

|                            | Total N | Number of deaths | Q4 (Highest) | Q3                  | Q2                  | Q1 ( Lowest)        | Trend HR            | P-Value |
|----------------------------|---------|------------------|--------------|---------------------|---------------------|---------------------|---------------------|---------|
| <b>All-cause Mortality</b> |         |                  |              |                     |                     |                     |                     |         |
| Model 0                    | 260,063 | 5,231            | 1 (Ref)      | 1.25 (1.16 to 1.37) | 1.56 (1.44 to 1.69) | 2.04 (1.89 to 2.21) | 1.27 (1.24 to 1.30) | <0.001  |
| Model 1                    | 260,063 | 5,231            | 1 (Ref)      | 1.30 (1.19 to 1.41) | 1.64 (1.51 to 1.78) | 2.18 (2.02 to 2.37) | 1.30 (1.26 to 1.33) | <0.001  |
| Model 2                    | 260,063 | 5,231            | 1 (Ref)      | 1.27 (1.16 to 1.38) | 1.54 (1.42 to 1.68) | 1.84 (1.70 to 2.00) | 1.22 (1.19 to 1.25) | <0.001  |
| Model 3                    | 260,063 | 5,231            | 1 (Ref)      | 1.25 (1.15 to 1.36) | 1.52 (1.40 to 1.66) | 1.78 (1.64 to 1.94) | 1.21 (1.18 to 1.24) | <0.001  |
| Model 4                    | 259,240 | 4,408            | 1 (Ref)      | 1.26 (1.15 to 1.38) | 1.51 (1.38 to 1.65) | 1.81 (1.66 to 1.98) | 1.22 (1.18 to 1.25) | <0.001  |
| <b>CVD</b>                 |         |                  |              |                     |                     |                     |                     |         |
| Model 0                    | 251,355 | 996              | 1 (Ref)      | 1.30 (1.07 to 1.58) | 1.72 (1.46 to 2.07) | 2.08 (1.73 to 2.50) | 1.28 (1.21 to 1.35) | <0.001  |
| Model 1                    | 251,355 | 996              | 1 (Ref)      | 1.32 (1.09 to 1.61) | 1.76 (1.46 to 2.13) | 2.16 (1.79 to 2.60) | 1.29 (1.22 to 1.37) | <0.001  |
| Model 2                    | 251,355 | 996              | 1 (Ref)      | 1.29 (1.06 to 1.57) | 1.65 (1.37 to 2.00) | 1.80 (1.49 to 2.18) | 1.21 (1.15 to 1.29) | <0.001  |
| Model 3                    | 251,355 | 996              | 1 (Ref)      | 1.28 (1.05 to 1.56) | 1.63 (1.35 to 1.98) | 1.71 (1.41 to 2.06) | 1.19 (1.13 to 1.27) | <0.001  |
| Model 4                    | 250,624 | 832              | 1 (Ref)      | 1.20 (0.96 to 1.48) | 1.55 (1.26 to 1.91) | 1.70 (1.39 to 2.09) | 1.20 (1.13 to 1.28) | <0.000  |
| <b>Respiratory System</b>  |         |                  |              |                     |                     |                     |                     |         |
| Model 0                    | 256,312 | 690              | 1 (Ref)      | 1.53 (1.20 to 1.98) | 1.93 (1.51 to 2.46) | 3.21 (2.55 to 4.04) | 1.46 (1.36 to 1.57) | <0.001  |
| Model 1                    | 256,312 | 690              | 1 (Ref)      | 1.55 (1.20 to 1.99) | 1.94 (1.52 to 2.49) | 3.24 (2.57 to 4.10) | 1.47 (1.36 to 1.57) | <0.001  |
| Model 2                    | 256,312 | 690              | 1 (Ref)      | 1.51 (1.17 to 1.94) | 1.80 (1.41 to 2.31) | 2.58 (2.04 to 3.27) | 1.35 (1.26 to 1.45) | <0.001  |
| Model 3                    | 256,312 | 690              | 1 (Ref)      | 1.47 (1.14 to 1.89) | 1.75 (1.36 to 2.24) | 2.43 (1.91 to 3.08) | 1.32 (1.23 to 1.42) | <0.001  |
| Model 4                    | 255,537 | 603              | 1 (Ref)      | 1.47 (1.13 to 1.93) | 1.77 (1.36 to 2.31) | 2.41 (1.87 to 3.10) | 1.32 (1.22 to 1.43) | <0.001  |
| <b>COPD</b>                |         |                  |              |                     |                     |                     |                     |         |
| Model 0                    | 256,312 | 100              | 1 (Ref)      | 1.68 (0.81 to 3.46) | 2.47 (1.24 to 4.91) | 4.24 (2.23 to 8.09) | 1.60 (1.33 to 1.94) | <0.001  |
| Model 1                    | 256,312 | 100              | 1 (Ref)      | 1.60 (0.77 to 3.30) | 2.29 (1.14 to 4.57) | 3.80 (1.97 to 7.35) | 1.55 (1.28 to 1.89) | <0.001  |
| Model 2                    | 256,312 | 100              | 1 (Ref)      | 1.55 (0.75 to 3.21) | 2.04 (1.02 to 4.09) | 2.72 (1.40 to 5.28) | 1.37 (1.13 to 1.66) | 0.001   |
| Model 3                    | 256,312 | 100              | 1 (Ref)      | 1.44 (0.69 to 2.98) | 1.84 (0.92 to 3.70) | 2.25 (1.15 to 4.40) | 1.29 (1.06 to 1.57) | 0.01    |
| Model 4                    | 255,537 | 89               | 1 (Ref)      | 1.57 (0.71 to 3.44) | 1.99 (0.93 to 4.22) | 2.48 (1.20 to 5.12) | 1.32 (1.07 to 1.63) | 0.009   |
| <b>All cancer</b>          |         |                  |              |                     |                     |                     |                     |         |
| Model 0                    | 236,666 | 2,380            | 1 (Ref)      | 1.16 (1.03 to 1.30) | 1.36 (1.21 to 1.53) | 1.55 (1.37 to 1.73) | 1.16 (1.12 to 1.20) | <0.001  |
| Model 1                    | 236,666 | 2,380            | 1 (Ref)      | 1.21 (1.07 to 1.36) | 1.45 (1.29 to 1.63) | 1.68 (1.49 to 1.89) | 1.19 (1.15 to 1.23) | <0.001  |
| Model 2                    | 236,666 | 2,380            | 1 (Ref)      | 1.20 (1.07 to 1.35) | 1.43 (1.27 to 1.61) | 1.61 (1.42 to 1.81) | 1.17 (1.13 to 1.22) | <0.001  |
| Model 3                    | 236,666 | 2,380            | 1 (Ref)      | 1.20 (1.06 to 1.34) | 1.42 (1.27 to 1.60) | 1.58 (1.40 to 1.78) | 1.17 (1.12 to 1.21) | <0.001  |
| Model 4                    | 236,187 | 2,113            | 1 (Ref)      | 1.22 (1.07 to 1.38) | 1.46 (1.29 to 1.66) | 1.63 (1.44 to 1.86) | 1.18 (1.13 to 1.23) | <0.001  |
| <b>Colorectal cancer</b>   |         |                  |              |                     |                     |                     |                     |         |
| Model 0                    | 236,666 | 225              | 1 (Ref)      | 1.25 (0.84 to 1.83) | 1.49 (1.01 to 2.18) | 1.70 (1.16 to 2.49) | 1.19 (1.05 to 1.34) | <0.001  |
| Model 1                    | 236,666 | 225              | 1 (Ref)      | 1.33 (0.90 to 1.96) | 1.65 (1.12 to 2.43) | 1.96 (1.33 to 2.90) | 1.25 (1.11 to 1.41) | <0.001  |
| Model 2                    | 236,666 | 225              | 1 (Ref)      | 1.33 (0.90 to 1.96) | 1.64 (1.12 to 2.42) | 1.93 (1.30 to 2.86) | 1.24 (1.10: 1.40)   | 0.001   |

|                      |         |     |         |                     |                     |                     |                     |        |
|----------------------|---------|-----|---------|---------------------|---------------------|---------------------|---------------------|--------|
| Model 3              | 236,666 | 225 | 1 (Ref) | 1.32 (0.90 to 1.96) | 1.65 (1.12 to 2.42) | 1.91 (1.29 to 2.84) | 1.24 (1.10 to 1.40) | 0.001  |
| Model 4              | 236,187 | 206 | 1 (Ref) | 1.40 (0.93 to 2.11) | 1.73 (1.15 to 2.59) | 1.94 (1.28 to 2.94) | 1.24 (1.09 to 1.41) | 0.001  |
| <b>Lung cancer</b>   |         |     |         |                     |                     |                     |                     |        |
| Model 0              | 236,666 | 501 | 1 (Ref) | 1.47 (1.13 to 1.91) | 1.65 (1.26 to 2.13) | 1.65 (1.26 to 2.15) | 1.16 (1.07 to 1.26) | <0.001 |
| Model 1              | 236,666 | 501 | 1 (Ref) | 1.48 (1.14 to 1.93) | 1.66 (1.28 to 2.17) | 1.67 (1.27 to 2.19) | 1.17 (1.08 to 1.27) | <0.001 |
| Model 2              | 236,666 | 501 | 1 (Ref) | 1.47 (1.13 to 1.91) | 1.63 (1.25 to 2.12) | 1.54 (1.17 to 2.03) | 1.14 (1.05 to 1.24) | 0.002  |
| Model 3              | 236,666 | 501 | 1 (Ref) | 1.45 (1.11 to 1.89) | 1.62 (1.24 to 2.11) | 1.53 (1.16 to 2.01) | 1.14 (1.05 to 1.24) | 0.002  |
| Model 4              | 236,187 | 428 | 1 (Ref) | 1.58 (1.18 to 2.11) | 1.75 (1.31 to 2.34) | 1.67 (1.23 to 2.25) | 1.16 (1.06 to 1.27) | 0.001  |
| <b>Breast cancer</b> |         |     |         |                     |                     |                     |                     |        |
| Model 0              | 236,666 | 204 | 1 (Ref) | 1.06 (0.71 to 1.57) | 0.99 (0.66 to 1.50) | 1.61 (1.11 to 2.35) | 1.15 (1.02 to 1.31) | 0.02   |
| Model 1              | 236,666 | 204 | 1 (Ref) | 1.14 (0.77 to 1.68) | 1.11 (0.73 to 1.68) | 1.88 (1.28 to 2.76) | 1.21 (1.07 to 1.38) | 0.003  |
| Model 2              | 236,666 | 204 | 1 (Ref) | 1.13 (0.76 to 1.68) | 1.10 (0.72 to 1.66) | 1.80 (1.22 to 2.66) | 1.20 (1.05 to 1.36) | 0.006  |
| Model 3              | 236,666 | 204 | 1 (Ref) | 1.14 (0.77 to 1.69) | 1.10 (0.73 to 1.67) | 1.80 (1.21 to 2.66) | 1.20 (1.05 to 1.36) | 0.007  |
| Model 4              | 236,187 | 191 | 1 (Ref) | 1.15 (0.78 to 1.72) | 0.96 (0.62 to 1.49) | 1.81 (1.21 to 2.69) | 1.18 (1.03 to 1.35) | 0.01   |

Data presented as adjusted hazard ratio (HR) (95%CI) by age-specific quartiles of grip strength. The highest quartile of grip strength was used as referent category. The Trend HR indicate the change in the HR by one quartile lower grip strength.

Model 0 was adjusted for, age, education qualifications, deprivation index, ethnicity and month of recruitment.

Model 1 was adjusted as in model 0 and for height

Model 2 was adjusted as in model 1 and for depression, diabetes, hypertension, respiratory disease, CVD, cancer and long-standing illness

Model 3 was adjusted as in model 2 and for BMI categories, smoking, physical activity, discretionary sedentary behaviour, dietary intake (alcohol, fruit and vegetable, oily fish, red meat and processed meat intake).

Model 4 was adjusted as in model 3 but participants who had events within the first 2 years of follow up were excluded from the analysis.

**Table I.** Association of quartiles of grip strength with cause-specific incidence in women

|                           | Total N | Number of events | Q4 (Highest) | Q3                  | Q2                  | Q1 (Lowest)         | Trend HR            | P-value |
|---------------------------|---------|------------------|--------------|---------------------|---------------------|---------------------|---------------------|---------|
| <b>CVD</b>                |         |                  |              |                     |                     |                     |                     |         |
| Model 0                   | 251,355 | 11,371           | 1 (Ref)      | 1.12 (1.06 to 1.18) | 1.61 (1.24 to 1.38) | 1.59 (1.51 to 1.68) | 1.17 (1.15 to 1.19) | <0.001  |
| Model 1                   | 251,355 | 11,371           | 1 (Ref)      | 1.16 (1.10 to 1.23) | 1.40 (1.32 to 1.47) | 1.75 (1.66 to 1.85) | 1.21 (1.19 to 1.23) | <0.001  |
| Model 2                   | 251,355 | 11,371           | 1 (Ref)      | 1.15 (1.09 to 1.21) | 1.35 (1.28 to 1.42) | 1.57 (1.49 to 1.66) | 1.16 (1.14 to 1.18) | <0.001  |
| Model 3                   | 251,355 | 11,371           | 1 (Ref)      | 1.15 (1.09 to 1.22) | 1.35 (1.28 to 1.43) | 1.54 (1.46 to 1.63) | 1.16 (1.14 to 1.18) | <0.001  |
| Model 4                   | 250,624 | 11,157           | 1 (Ref)      | 1.15 (1.09 to 1.21) | 1.35 (1.27 to 1.42) | 1.54 (1.46 to 1.63) | 1.16 (1.14 to 1.18) | <0.001  |
| <b>Respiratory System</b> |         |                  |              |                     |                     |                     |                     |         |
| Model 0                   | 256,312 | 4,947            | 1 (Ref)      | 1.28 (1.17 to 1.39) | 1.48 (1.35 to 1.61) | 2.36 (2.18 to 2.56) | 1.32 (1.30 to 1.37) | <0.001  |
| Model 1                   | 256,312 | 4,947            | 1 (Ref)      | 1.29 (1.18 to 1.41) | 1.50 (1.37 to 1.63) | 2.41 (2.22 to 2.62) | 1.34 (1.30 to 1.37) | <0.001  |
| Model 2                   | 256,312 | 4,947            | 1 (Ref)      | 1.26 (1.15 to 1.38) | 1.40 (1.29 to 1.54) | 1.98 (1.82 to 2.15) | 1.25 (1.22 to 1.28) | <0.001  |
| Model 3                   | 256,312 | 4,947            | 1 (Ref)      | 1.25 (1.14 to 1.37) | 1.39 (1.27 to 1.52) | 1.91 (1.75 to 2.07) | 1.23 (1.20 to 1.27) | <0.001  |
| Model 4                   | 255,537 | 4,810            | 1 (Ref)      | 1.25 (1.14 to 1.37) | 1.39 (1.27 to 1.52) | 1.90 (1.75 to 2.08) | 1.23 (1.20 to 1.27) | <0.001  |
| <b>COPD</b>               |         |                  |              |                     |                     |                     |                     |         |
| Model 0                   | 256,312 | 485              | 1 (Ref)      | 1.71 (1.23 to 2.36) | 2.19 (1.60 to 3.00) | 3.69 (2.76 to 4.94) | 1.52 (1.39 to 1.65) | <0.001  |
| Model 1                   | 256,312 | 485              | 1 (Ref)      | 1.61 (1.17 to 2.23) | 2.01 (1.47 to 2.76) | 3.27 (2.42 to 4.40) | 1.46 (1.34 to 1.60) | <0.001  |
| Model 2                   | 256,312 | 485              | 1 (Ref)      | 1.57 (1.14 to 2.17) | 1.82 (1.33 to 2.50) | 2.39 (1.77 to 3.23) | 1.30 (1.19 to 1.42) | <0.001  |
| Model 3                   | 256,312 | 485              | 1 (Ref)      | 1.50 (1.08 to 2.08) | 1.73 (1.26 to 2.37) | 2.15 (1.59 to 2.91) | 1.26 (1.15 to 1.38) | <0.001  |
| Model 4                   | 255,537 | 473              | 1 (Ref)      | 1.51 (1.09 to 2.10) | 1.76 (1.28 to 2.43) | 2.19 (1.61 to 2.98) | 1.27 (1.16 to 1.38) | <0.001  |
| <b>All cancer</b>         |         |                  |              |                     |                     |                     |                     |         |
| Model 0                   | 236,666 | 13,502           | 1 (Ref)      | 1.09 (1.03 to 1.14) | 1.15 (1.09 to 1.21) | 1.29 (1.22 to 1.35) | 1.08 (1.07 to 1.10) | <0.001  |
| Model 1                   | 236,666 | 13,502           | 1 (Ref)      | 1.13 (1.08 to 1.19) | 1.22 (1.16 to 1.28) | 1.40 (1.33 to 1.47) | 1.12 (1.10 to 1.13) | <0.001  |
| Model 2                   | 236,666 | 13,502           | 1 (Ref)      | 1.13 (1.08 to 1.19) | 1.22 (1.16 to 1.28) | 1.39 (1.32 to 1.46) | 1.11 (1.10 to 1.13) | <0.001  |
| Model 3                   | 236,666 | 13,502           | 1 (Ref)      | 1.13 (1.07 to 1.18) | 1.22 (1.16 to 1.28) | 1.38 (1.31 to 1.45) | 1.10 (1.09 to 1.13) | <0.001  |
| Model 4                   | 236,187 | 13,229           | 1 (Ref)      | 1.13 (1.08 to 1.19) | 1.22 (1.16 to 1.28) | 1.39 (1.32 to 1.46) | 1.11 (1.09 to 1.13) | <0.001  |
| <b>Colorectal cancer</b>  |         |                  |              |                     |                     |                     |                     |         |
| Model 0                   | 236,666 | 1,083            | 1 (Ref)      | 1.21 (1.03 to 1.14) | 1.19 (1.01 to 1.42) | 1.31 (1.10 to 1.55) | 1.08 (1.02 to 1.14) | <0.001  |
| Model 1                   | 236,666 | 1,083            | 1 (Ref)      | 1.28 (1.08 to 1.51) | 1.28 (1.08 to 1.53) | 1.45 (1.21 to 1.73) | 1.12 (1.06 to 1.18) | <0.001  |
| Model 2                   | 236,666 | 1,083            | 1 (Ref)      | 1.28 (1.08 to 1.51) | 1.29 (1.08 to 1.54) | 1.47 (1.23 to 1.76) | 1.12 (1.06 to 1.19) | <0.001  |
| Model 3                   | 236,666 | 1,083            | 1 (Ref)      | 1.28 (1.08 to 1.51) | 1.28 (1.08 to 1.53) | 1.46 (1.22 to 1.74) | 1.12 (1.06 to 1.18) | <0.001  |
| Model 4                   | 236,187 | 1,062            | 1 (Ref)      | 1.29 (1.09 to 1.53) | 1.29 (1.08 to 1.54) | 1.45 (1.21 to 1.74) | 1.12 (1.05 to 1.18) | <0.001  |
| <b>Lung cancer</b>        |         |                  |              |                     |                     |                     |                     |         |
| Model 0                   | 236,666 | 779              | 1 (Ref)      | 1.41 (1.14 to 1.74) | 1.53 (1.23 to 1.88) | 1.62 (1.31 to 1.99) | 1.15 (1.08 to 1.23) | <0.001  |
| Model 1                   | 236,666 | 779              | 1 (Ref)      | 1.43 (1.15 to 1.77) | 1.56 (1.26 to 1.93) | 1.67 (1.34 to 2.07) | 1.17 (1.09 to 1.25) | <0.001  |
| Model 2                   | 236,666 | 779              | 1 (Ref)      | 1.42 (1.14 to 1.75) | 1.52 (1.23 to 1.89) | 1.53 (1.23 to 1.91) | 1.13 (1.06 to 1.21) | <0.001  |
| Model 3                   | 236,666 | 779              | 1 (Ref)      | 1.40 (1.13 to 1.74) | 1.53 (1.23 to 1.89) | 1.53 (1.23 to 1.90) | 1.13 (1.06 to 1.21) | <0.001  |

|                      |         |       |         |                      |                     |                     |                     |        |
|----------------------|---------|-------|---------|----------------------|---------------------|---------------------|---------------------|--------|
| Model 4              | 236,187 | 704   | 1 (Ref) | 1.47 (1.18 to 1.85)  | 1.59 (1.27 to 2.00) | 1.61 (1.28 to 2.03) | 1.15 (1.07 to 1.23) | <0.001 |
| <b>Breast cancer</b> |         |       |         |                      |                     |                     |                     |        |
| Model 0              | 236,666 | 4,352 | 1 (Ref) | 1.03 (0.695 to 1.12) | 1.07 (0.98 to 1.16) | 1.21 (1.11 to 1.31) | 1.06 (1.03 to 1.09) | <0.001 |
| Model 1              | 236,666 | 4,352 | 1 (Ref) | 1.09 (1.00 to 1.18)  | 1.16 (1.07 to 1.26) | 1.35 (1.24 to 1.48) | 1.10 (1.07 to 1.13) | <0.001 |
| Model 2              | 236,666 | 4,352 | 1 (Ref) | 1.09 (1.00 to 1.18)  | 1.16 (1.07 to 1.27) | 1.36 (1.24 to 1.48) | 1.10 (1.07 to 1.13) | <0.001 |
| Model 3              | 236,666 | 4,352 | 1 (Ref) | 1.09 (1.00 to 1.18)  | 1.16 (1.07 to 1.27) | 1.35 (1.24 to 1.48) | 1.10 (1.07 to 1.13) | <0.001 |
| Model 4              | 236,187 | 4,337 | 1 (Ref) | 1.09 (1.00 to 1.19)  | 1.16 (1.06 to 1.26) | 1.35 (1.24 to 1.48) | 1.10 (1.07 to 1.13) | <0.001 |

Data presented as adjusted hazard ratio (HR) (95%CI) by age-specific quartiles of grip strength. The highest quartile of grip strength was used as referent category. The Trend HR indicate the change in the HR by one quartile lower grip strength.

Model 0 was adjusted for, age, education qualifications, deprivation index, ethnicity and month of recruitment.

Model 1 was adjusted as in model 0 and for height

Model 2 was adjusted as in model 1 and for depression, diabetes, hypertension, respiratory disease, CVD, cancer and long-standing illness

Model 3 was adjusted as in model 2 and for BMI categories, smoking, physical activity, discretionary sedentary behaviour, dietary intake (alcohol, fruit and vegetable, oily fish, red meat and processed meat intake).

Model 4 was adjusted as in model 3 but participants who had events within the first 2 years of follow up were excluded from the analysis.

**Table J.** Association of quartiles of grip strength with all- and cause-specific mortality in men.

|                            | Total N | Number of deaths | Q4 (Highest) | Q3                  | Q2                  | Q1 ( Lowest)        | Trend HR            | P-value |
|----------------------------|---------|------------------|--------------|---------------------|---------------------|---------------------|---------------------|---------|
| <b>All-cause Mortality</b> |         |                  |              |                     |                     |                     |                     |         |
| Model 0                    | 217,011 | 8,091            | 1 (Ref)      | 1.21 (1.12 to 1.29) | 1.39 (1.31 to 1.49) | 2.11 (1.98 to 2.25) | 1.28 (1.25 to 1.31) | <0.001  |
| Model 1                    | 217,011 | 8,091            | 1 (Ref)      | 1.23 (1.15 to 1.32) | 1.44 (1.34 to 1.54) | 2.20 (2.06 to 2.35) | 1.30 (1.27 to 1.33) | <0.001  |
| Model 2                    | 217,011 | 8,091            | 1 (Ref)      | 1.21 (1.13 to 1.30) | 1.38 (1.29 to 1.48) | 1.97 (1.85 to 2.11) | 1.25 (1.23 to 1.28) | <0.001  |
| Model 3                    | 217,011 | 8,091            | 1 (Ref)      | 1.21 (1.13 to 1.30) | 1.38 (1.28 to 1.48) | 1.91 (1.79 to 2.05) | 1.24 (1.21 to 1.27) | <0.001  |
| Model 4                    | 215,523 | 6,603            | 1 (Ref)      | 1.21 (1.12 to 1.31) | 1.38 (1.28 to 1.49) | 1.86 (1.73 to 2.01) | 1.23 (1.20 to 1.26) | <0.001  |
| <b>CVD</b>                 |         |                  |              |                     |                     |                     |                     |         |
| Model 0                    | 198,553 | 2,037            | 1 (Ref)      | 1.39 (1.20 to 1.59) | 1.54 (1.33 to 1.77) | 2.59 (2.27 to 2.95) | 1.36 (1.31 to 1.42) | <0.001  |
| Model 1                    | 198,553 | 2,037            | 1 (Ref)      | 1.41 (1.23 to 1.63) | 1.58 (1.37 to 1.82) | 2.71 (2.36 to 3.10) | 1.38 (1.32 to 1.44) | <0.001  |
| Model 2                    | 198,553 | 2,037            | 1 (Ref)      | 1.39 (1.20 to 1.60) | 1.53 (1.32 to 1.76) | 2.45 (2.14 to 2.80) | 1.33 (1.28 to 1.39) | <0.001  |
| Model 3                    | 198,553 | 2,037            | 1 (Ref)      | 1.41 (1.22 to 1.62) | 1.55 (1.34 to 1.79) | 2.42 (2.12 to 2.78) | 1.32 (1.27 to 1.38) | <0.001  |
| Model 4                    | 197,420 | 1,685            | 1 (Ref)      | 1.37 (1.17 to 1.60) | 1.50 (1.28 to 1.75) | 2.33 (2.01 to 2.71) | 1.31 (1.25 to 1.37) | <0.001  |
| <b>Respiratory System</b>  |         |                  |              |                     |                     |                     |                     |         |
| Model 0                    | 213,065 | 1,372            | 1 (Ref)      | 1.43 (1.18 to 1.72) | 1.99 (1.67 to 2.38) | 3.23 (2.73 to 3.83) | 1.48 (1.41 to 1.56) | <0.001  |
| Model 1                    | 213,065 | 1,372            | 1 (Ref)      | 1.40 (1.16 to 1.70) | 1.94 (1.62 to 2.33) | 3.11 (2.61 to 3.71) | 1.47 (1.39 to 1.55) | <0.001  |
| Model 2                    | 213,065 | 1,372            | 1 (Ref)      | 1.38 (1.14 to 1.66) | 1.85 (1.54 to 2.22) | 2.73 (2.29 to 3.26) | 1.40 (1.33 to 1.48) | <0.001  |
| Model 3                    | 213,065 | 1,372            | 1 (Ref)      | 1.34 (1.11 to 1.63) | 1.80 (1.50 to 2.16) | 2.58 (2.16 to 3.08) | 1.38 (1.30 to 1.45) | <0.001  |
| Model 4                    | 211,695 | 1,159            | 1 (Ref)      | 1.33 (1.09 to 1.64) | 1.80 (1.48 to 2.19) | 2.53 (2.09 to 3.07) | 1.37 (1.29 to 1.45) | <0.001  |
| <b>COPD</b>                |         |                  |              |                     |                     |                     |                     |         |
| Model 0                    | 213,065 | 230              | 1 (Ref)      | 1.08 (0.66 to 1.75) | 1.77 (1.15 to 2.73) | 3.02 (2.01 to 4.54) | 1.51 (1.33 to 1.75) | <0.001  |
| Model 1                    | 213,065 | 230              | 1 (Ref)      | 1.03 (0.63 to 1.67) | 1.63 (1.05 to 2.54) | 2.70 (1.77 to 4.10) | 1.46 (1.28 to 1.67) | <0.001  |
| Model 2                    | 213,065 | 230              | 1 (Ref)      | 1.01 (0.62 to 1.63) | 1.52 (0.97 to 2.35) | 2.25 (1.47 to 3.42) | 1.36 (1.20 to 1.56) | <0.001  |
| Model 3                    | 213,065 | 230              | 1 (Ref)      | 0.97 (0.60 to 1.57) | 1.47 (0.95 to 2.29) | 2.03 (1.32 to 3.10) | 1.32 (1.16 to 1.51) | <0.001  |
| Model 4                    | 211,695 | 196              | 1 (Ref)      | 1.06 (0.64 to 1.75) | 1.34 (0.83 to 2.15) | 1.96 (1.25 to 3.09) | 1.28 (1.11 to 1.48) | 0.001   |
| <b>All cancer</b>          |         |                  |              |                     |                     |                     |                     |         |
| Model 0                    | 203,844 | 3,358            | 1 (Ref)      | 1.10 (1.00 to 1.21) | 1.17 (1.06 to 1.29) | 1.48 (1.34 to 1.63) | 1.13 (1.10 to 1.17) | <0.001  |
| Model 1                    | 203,844 | 3,358            | 1 (Ref)      | 1.15 (1.04 to 1.28) | 1.25 (1.13 to 1.39) | 1.63 (1.48 to 1.81) | 1.17 (1.13 to 1.21) | <0.001  |
| Model 2                    | 203,844 | 3,358            | 1 (Ref)      | 1.15 (1.04 to 1.27) | 1.24 (1.12 to 1.37) | 1.58 (1.42 to 1.74) | 1.16 (1.12 to 1.20) | <0.001  |
| Model 3                    | 203,844 | 3,358            | 1 (Ref)      | 1.16 (1.04 to 1.28) | 1.24 (1.12 to 1.38) | 1.56 (1.41 to 1.73) | 1.15 (1.12 to 1.19) | <0.001  |
| Model 4                    | 202,776 | 2,920            | 1 (Ref)      | 1.18 (1.06 to 1.31) | 1.26 (1.13 to 1.40) | 1.55 (1.39 to 1.73) | 1.15 (1.11 to 1.19) | <0.001  |
| <b>Colorectal cancer</b>   |         |                  |              |                     |                     |                     |                     |         |
| Model 0                    | 203,844 | 336              | 1 (Ref)      | 1.15 (0.83 to 1.59) | 1.42 (1.04 to 1.94) | 1.59 (1.16 to 2.18) | 1.17 (1.06 to 1.29) | <0.001  |
| Model 1                    | 203,844 | 336              | 1 (Ref)      | 1.23 (0.89 to 1.70) | 1.56 (1.14 to 2.15) | 1.83 (1.32 to 2.53) | 1.23 (1.11 to 1.36) | <0.001  |
| Model 2                    | 203,844 | 336              | 1 (Ref)      | 1.23 (0.89 to 1.70) | 1.56 (1.13 to 2.14) | 1.80 (1.30 to 2.50) | 1.22 (1.10 to 1.35) | <0.001  |

|                        |         |     |         |                     |                     |                     |                     |        |
|------------------------|---------|-----|---------|---------------------|---------------------|---------------------|---------------------|--------|
| Model 3                | 203,844 | 336 | 1 (Ref) | 1.26 (0.91 to 1.74) | 1.59 (1.16 to 2.19) | 1.85 (1.34 to 2.58) | 1.23 (1.11 to 1.36) | <0.001 |
| Model 4                | 202,776 | 295 | 1 (Ref) | 1.21 (0.86 to 1.71) | 1.58 (1.13 to 2.22) | 1.77 (1.25 to 2.51) | 1.22 (1.09 to 1.36) | <0.001 |
| <b>Lung cancer</b>     |         |     |         |                     |                     |                     |                     |        |
| Model 0                | 203,844 | 716 | 1 (Ref) | 1.08 (0.87 to 1.35) | 1.12 (0.90 to 1.40) | 1.51 (1.22 to 1.86) | 1.14 (1.07 to 1.22) | <0.001 |
| Model 1                | 203,844 | 716 | 1 (Ref) | 1.11 (0.89 to 1.39) | 1.18 (0.94 to 1.47) | 1.61 (1.29 to 2.00) | 1.17 (1.09 to 1.25) | <0.001 |
| Model 2                | 203,844 | 716 | 1 (Ref) | 1.11 (0.89 to 1.38) | 1.16 (0.92 to 1.44) | 1.52 (1.22 to 1.89) | 1.14 (1.07 to 1.23) | <0.001 |
| Model 3                | 203,844 | 716 | 1 (Ref) | 1.10 (0.88 to 1.38) | 1.15 (0.92 to 1.44) | 1.48 (1.18 to 1.84) | 1.13 (1.06 to 1.22) | 0.001  |
| Model 4                | 202,776 | 614 | 1 (Ref) | 1.07 (0.85 to 1.37) | 1.17 (0.92 to 1.49) | 1.53 (1.20 to 1.94) | 1.15 (1.07 to 1.24) | <0.001 |
| <b>Prostate cancer</b> |         |     |         |                     |                     |                     |                     |        |
| Model 0                | 203,844 | 254 | 1 (Ref) | 1.14 (0.81 to 1.61) | 0.87 (0.60 to 1.26) | 1.21 (0.84 to 1.71) | 1.02 (0.91 to 1.15) | 0.61   |
| Model 1                | 203,844 | 254 | 1 (Ref) | 1.22 (0.86 to 1.72) | 0.96 (0.66 to 1.40) | 1.38 (0.96 to 1.98) | 1.07 (0.96 to 1.21) | 0.23   |
| Model 2                | 203,844 | 254 | 1 (Ref) | 1.22 (0.86 to 1.73) | 0.97 (0.67 to 1.41) | 1.41 (0.97 to 2.03) | 1.08 (0.96 to 1.22) | 0.19   |
| Model 3                | 203,844 | 254 | 1 (Ref) | 1.22 (0.87 to 1.73) | 0.97 (0.67 to 1.42) | 1.39 (0.96 to 2.01) | 1.08 (0.96 to 1.21) | 0.21   |
| Model 4                | 202,776 | 238 | 1 (Ref) | 1.28 (0.90 to 1.82) | 0.93 (0.63 to 1.38) | 1.41 (0.97 to 2.07) | 1.07 (0.95 to 1.21) | 0.25   |

Data presented as adjusted hazard ratio (HR) (95%CI) by age-specific quartiles of grip strength. The highest quartile of grip strength was used as referent category. The Trend HR indicate the change in the HR by one quartile lower grip strength.

Model 0 was adjusted for, age, education qualifications, deprivation index, ethnicity and month of recruitment.

Model 1 was adjusted as in model 0 and for height

Model 2 was adjusted as in model 1 and for depression, diabetes, hypertension, respiratory disease, CVD, cancer and long-standing illness

Model 3 was adjusted as in model 2 and for BMI categories, smoking, physical activity, discretionary sedentary behaviour, dietary intake (alcohol, fruit and vegetable, oily fish, red meat and processed meat intake).

Model 4 was adjusted as in model 3 but participants who had events within the first 2 years of follow up were excluded from the analysis.

**Table K.** Association of quartiles of grip strength with cause-specific incidence in men.

|                           | Total N | Number of events | Q4 (Highest) | Q3                  | Q2                  | Q1 (Lowest)         | Trend HR            | P-value |
|---------------------------|---------|------------------|--------------|---------------------|---------------------|---------------------|---------------------|---------|
| <b>CVD</b>                |         |                  |              |                     |                     |                     |                     |         |
| Model 0                   | 198,553 | 16,688           | 1 (Ref)      | 1.08 (1.04 to 1.13) | 1.18 (1.13 to 1.24) | 1.48 (1.41 to 1.54) | 1.14 (1.12 to 1.15) | <0.001  |
| Model 1                   | 198,553 | 16,688           | 1 (Ref)      | 1.13 (1.08 to 1.18) | 1.26 (1.20 to 1.31) | 1.60 (1.53 to 1.67) | 1.17 (1.15 to 1.18) | <0.001  |
| Model 2                   | 198,553 | 16,688           | 1 (Ref)      | 1.11 (1.06 to 1.17) | 1.23 (1.18 to 1.29) | 1.52 (1.45 to 1.59) | 1.15 (1.13 to 1.16) | <0.001  |
| Model 3                   | 198,553 | 16,688           | 1 (Ref)      | 1.14 (1.09 to 1.19) | 1.27 (1.21 to 1.33) | 1.55 (1.48 to 1.62) | 1.15 (1.14 to 1.17) | <0.001  |
| Model 4                   | 197,420 | 16,275           | 1 (Ref)      | 1.13 (1.08 to 1.18) | 1.26 (1.21 to 1.32) | 1.54 (1.47 to 1.61) | 1.15 (1.13 to 1.17) | <0.001  |
| <b>Respiratory System</b> |         |                  |              |                     |                     |                     |                     |         |
| Model 0                   | 213,065 | 5,595            | 1 (Ref)      | 1.15 (1.06 to 1.25) | 1.44 (1.32 to 1.56) | 2.12 (1.96 to 2.30) | 1.30 (1.26 to 1.33) | <0.001  |
| Model 1                   | 213,065 | 5,595            | 1 (Ref)      | 1.16 (1.06 to 1.26) | 1.45 (1.33 to 1.58) | 2.15 (1.98 to 2.33) | 1.30 (1.27 to 1.34) | <0.001  |
| Model 2                   | 213,065 | 5,595            | 1 (Ref)      | 1.13 (1.04 to 1.24) | 1.39 (1.28 to 1.51) | 1.89 (1.75 to 2.05) | 1.25 (1.22 to 1.28) | <0.001  |
| Model 3                   | 213,065 | 5,595            | 1 (Ref)      | 1.14 (1.04 to 1.24) | 1.39 (1.28 to 1.51) | 1.86 (1.72 to 2.02) | 1.24 (1.21 to 1.27) | <0.001  |
| Model 4                   | 211,695 | 5,295            | 1 (Ref)      | 1.14 (1.05 to 1.25) | 1.40 (1.28 to 1.52) | 1.86 (1.71 to 2.02) | 1.24 (1.21 to 1.27) | <0.001  |
| <b>COPD</b>               |         |                  |              |                     |                     |                     |                     |         |
| Model 0                   | 213,065 | 646              | 1 (Ref)      | 1.18 (0.90 to 1.54) | 1.63 (1.27 to 2.09) | 2.36 (1.86 to 3.00) | 1.35 (1.26 to 1.46) | <0.001  |
| Model 1                   | 213,065 | 646              | 1 (Ref)      | 1.13 (0.87 to 1.48) | 1.52 (1.18 to 1.96) | 2.15 (1.68 to 2.75) | 1.32 (1.22 to 1.42) | <0.001  |
| Model 2                   | 213,065 | 646              | 1 (Ref)      | 1.11 (0.85 to 1.45) | 1.41 (1.09 to 1.82) | 1.79 (1.40 to 2.29) | 1.23 (1.14 to 1.33) | <0.001  |
| Model 3                   | 213,065 | 646              | 1 (Ref)      | 1.09 (0.84 to 1.43) | 1.42 (1.10 to 1.83) | 1.70 (1.32 to 2.18) | 1.21 (1.12 to 1.31) | <0.001  |
| Model 4                   | 211,695 | 604              | 1 (Ref)      | 1.14 (0.87 to 1.50) | 1.38 (1.06 to 1.80) | 1.67 (1.29 to 2.16) | 1.19 (1.10 to 1.29) | <0.001  |
| <b>All cancer</b>         |         |                  |              |                     |                     |                     |                     |         |
| Model 0                   | 203,844 | 14,202           | 1 (Ref)      | 1.08 (1.03 to 1.13) | 1.10 (1.05 to 1.16) | 1.26 (1.19(1.31)    | 1.07 (1.06 to 1.09) | <0.001  |
| Model 1                   | 203,844 | 14,202           | 1 (Ref)      | 1.12 (1.07 to 1.17) | 1.17 (1.11 to 1.23) | 1.36 (1.30 to 1.43) | 1.10 (1.09 to 1.12) | <0.001  |
| Model 2                   | 203,844 | 14,202           | 1 (Ref)      | 1.12 (1.06 to 1.17) | 1.16 (1.11 to 1.22) | 1.35 (1.28 to 1.42) | 1.10 (1.08 to 1.12) | <0.001  |
| Model 3                   | 203,844 | 14,202           | 1 (Ref)      | 1.12 (1.07 to 1.18) | 1.17 (1.11 to 1.23) | 1.35 (1.29 to 1.42) | 1.10 (1.08 to 1.12) | <0.001  |
| Model 4                   | 202,776 | 13,754           | 1 (Ref)      | 1.12 (1.07 to 1.18) | 1.17 (1.12 to 1.23) | 1.35 (1.28 to 1.42) | 1.10 (1.08 to 1.12) | <0.001  |
| <b>Colorectal cancer</b>  |         |                  |              |                     |                     |                     |                     |         |
| Model 0                   | 203,844 | 1,528            | 1 (Ref)      | 1.14 (1.00 to 1.32) | 1.18 (1.02 to 1.37) | 1.31 (1.13 to 1.52) | 1.09 (1.04 to 1.14) | <0.001  |
| Model 1                   | 203,844 | 1,528            | 1 (Ref)      | 1.18 (1.02 to 1.36) | 1.23 (1.06 to 1.43) | 1.39 (1.19 to 1.62) | 1.11 (1.06 to 1.16) | <0.001  |
| Model 2                   | 203,844 | 1,528            | 1 (Ref)      | 1.18 (1.02 to 1.37) | 1.23 (1.06 to 1.43) | 1.39 (1.20 to 1.62) | 1.11 (1.06 to 1.16) | <0.001  |
| Model 3                   | 203,844 | 1,528            | 1 (Ref)      | 1.20 (1.04 to 1.39) | 1.26 (1.08 to 1.46) | 1.43 (1.23 to 1.67) | 1.12 (1.06 to 1.17) | <0.001  |
| Model 4                   | 202,776 | 1,478            | 1 (Ref)      | 1.20 (1.04 to 1.40) | 1.26 (1.08 to 1.46) | 1.43 (1.23 to 1.67) | 1.12 (1.06 to 1.17) | <0.001  |
| <b>Lung cancer</b>        |         |                  |              |                     |                     |                     |                     |         |
| Model 0                   | 203,844 | 962              | 1 (Ref)      | 1.15 (0.95 to 1.39) | 1.10 (0.91 to 1.33) | 1.51 (1.26 to 1.81) | 1.13 (1.07 to 1.20) | <0.001  |
| Model 1                   | 203,844 | 962              | 1 (Ref)      | 1.18 (0.97 to 1.43) | 1.15 (0.94 to 1.39) | 1.59 (1.32 to 1.93) | 1.15 (1.09 to 1.22) | <0.001  |
| Model 2                   | 203,844 | 962              | 1 (Ref)      | 1.17 (0.96 to 1.41) | 1.12 (0.92 to 1.37) | 1.51 (1.25 to 1.83) | 1.13 (1.06 to 1.20) | <0.001  |

|                        |         |       |         |                     |                       |                     |                     |        |
|------------------------|---------|-------|---------|---------------------|-----------------------|---------------------|---------------------|--------|
| Model 3                | 203,844 | 962   | 1 (Ref) | 1.17 (0.96 to 1.41) | 1.12 (0.92 to 1.37)   | 1.48 (1.22 to 1.79) | 1.12 (1.06 to 1.19) | <0.001 |
| Model 4                | 202,776 | 852   | 1 (Ref) | 1.16 (0.94 to 1.42) | 1.16 (0.94 to 1.43)   | 1.54 (1.26 to 1.89) | 1.14 (1.07 to 1.22) | <0.001 |
| <b>Prostate cancer</b> |         |       |         |                     |                       |                     |                     |        |
| Model 0                | 203,844 | 3,249 | 1 (Ref) | 1.07 (0.97 to 1.18) | 1.05 (0.95 to 1.15)   | 1.13 (1.02 to 1.24) | 1.03 (1.00 to 1.06) | 0.04   |
| Model 1                | 203,844 | 3,249 | 1 (Ref) | 1.10 (1.00 to 1.22) | 1.10 (0.99 to 1.21)   | 1.21 (1.09 to 1.34) | 1.06 (1.02 to 1.09) | 0.001  |
| Model 2                | 203,844 | 3,249 | 1 (Ref) | 1.11 (1.00 to 1.22) | 1.10 (1.00 to 1.22)   | 1.23 (1.11 to 1.36) | 1.06 (1.03 to 1.10) | <0.001 |
| Model 3                | 203,844 | 3,249 | 1 (Ref) | 1.11 (1.00 to 1.22) | 1.10 (1.00 to 1.22)   | 1.24 (1.12 to 1.38) | 1.07 (1.03 to 1.10) | <0.001 |
| Model 4                | 202,776 | 3,229 | 1 (Ref) | 1.11 (1.01 to 1.23) | 1.10 to 1.00 to 1.22) | 1.24 (1.12 to 1.38) | 1.07 (1.03 to 1.10) | <0.001 |

Data presented as adjusted hazard ratio (HR) (95%CI) by age-specific quartiles of grip strength. The highest quartile of grip strength was used as referent category. The Trend HR indicate the change in the HR by one quartile lower grip strength.

Model 0 was adjusted for, age, education qualifications, deprivation index, ethnicity and month of recruitment.

Model 1 was adjusted as in model 0 and for height

Model 2 was adjusted as in model 1 and for depression, diabetes, hypertension, respiratory disease, CVD, cancer and long-standing illness

Model 3 was adjusted as in model 2 and for BMI categories, smoking, physical activity, discretionary sedentary behaviour, dietary intake (alcohol, fruit and vegetable, oily fish, red meat and processed meat intake).

Model 4 was adjusted as in model 3 but participants who had events within the first 2 years of follow up were excluded from the analysis.

**Table L.** Association of grip strength with all- and cause-specific mortality by age categories in women and men

|                                        | Women   |                  |                                      | Men     |                  |                                      |
|----------------------------------------|---------|------------------|--------------------------------------|---------|------------------|--------------------------------------|
|                                        | Total N | Number of deaths | HR (95% CI) 5-kg lower grip strength | Total N | Number of deaths | HR (95% CI) 5-kg lower grip strength |
| <b>All-cause Mortality</b>             |         |                  | $P_{\text{interaction}} < 0.001$     |         |                  | $P_{\text{interaction}} = 0.03$      |
| ≤55 years                              | 88,367  | 1,344            | 1.22 (1.18 to 1.26)                  | 111,904 | 1,073            | 1.23 (1.17 to 1.28)                  |
| 56-65 years                            | 94,079  | 3,967            | 1.18 (1.16 to 1.21)                  | 112,939 | 2,651            | 1.22 (1.17 to 1.27)                  |
| >65 years                              | 34,565  | 2,780            | 1.17 (1.14 to 1.20)                  | 35,220  | 1,507            | 1.19 (1.15 to 1.23)                  |
| <b>CVD</b>                             |         |                  | $P_{\text{interaction}} = 0.79$      |         |                  | $P_{\text{interaction}} < 0.001$     |
| ≤55 years                              | 110,367 | 168              | 1.18 (1.05 to 1.33)                  | 85,625  | 348              | 1.30 (1.22 to 1.39)                  |
| 56-65 years                            | 108,522 | 502              | 1.17 (1.09, 1.26)                    | 84,352  | 1,011            | 1.25 (1.21 to 1.30)                  |
| >65 years                              | 32,466  | 326              | 1.27 (1.15 to 1.39)                  | 28,576  | 678              | 1.19 (1.13 to 1.25)                  |
| <b>Respiratory System</b>              |         |                  | $P_{\text{interaction}} = 0.06$      |         |                  | $P_{\text{interaction}} < 0.001$     |
| ≤55 years                              | 111,048 | 101              | 1.42 (1.23 to 1.63)                  | 87,598  | 161              | 1.32 (1.21 to 1.44)                  |
| 56-65 years                            | 110,931 | 344              | 1.30 (1.19 to 1.41)                  | 92,046  | 638              | 1.31 (1.25 to 1.38)                  |
| >65 years                              | 34,333  | 245              | 1.35 (1.21 to 1.50)                  | 33,421  | 573              | 1.21 (1.15 to 1.28)                  |
| <b>COPD</b>                            |         |                  | $P_{\text{interaction}} = 0.88$      |         |                  | $P_{\text{interaction}} = 0.001$     |
| ≤55 years                              | 111,048 | 13               | 1.38 (0.93 to 2.05)                  | 87,598  | 14               | 1.46 (1.12 to 1.90)                  |
| 56-65 years                            | 110,931 | 51               | 1.13 (0.91 to 1.41)                  | 92,046  | 106              | 1.30 (1.16 to 1.45)                  |
| >65 years                              | 34,333  | 36               | 1.46 (1.11 to 1.93)                  | 33,421  | 110              | 1.15 (1.02 to 1.30)                  |
| <b>All cancer</b>                      |         |                  | $P_{\text{interaction}} = 0.03$      |         |                  | $P_{\text{interaction}} = 0.003$     |
| ≤55 years                              | 105,357 | 470              | 1.19 (1.11 to 1.28)                  | 85,784  | 485              | 1.14 (1.07 to 1.20)                  |
| 56-65 years                            | 100,883 | 1,238            | 1.18 (1.13 to 1.24)                  | 87,407  | 1,707            | 1.13 (1.09 to 1.16)                  |
| >65 years                              | 30,426  | 672              | 1.15 (1.08 to 1.23)                  | 30,653  | 1,166            | 1.11 (1.07 to 1.15)                  |
| <b>Colorectal cancer</b>               |         |                  | $P_{\text{interaction}} = 0.97$      |         |                  | $P_{\text{interaction}} = 0.58$      |
| ≤55 years                              | 105,357 | 48               | 1.15 (0.91 to 1.46)                  | 85,784  | 71               | 1.11 (0.94 to 1.32)                  |
| 56-65 years                            | 100,883 | 112              | 1.26 (1.08 to 1.48)                  | 87,407  | 163              | 1.19 (1.08 to 1.32)                  |
| >65 years                              | 30,426  | 65               | 1.11 (0.90 to 1.38)                  | 30,653  | 102              | 1.26 (1.11 to 1.43)                  |
| <b>Lung cancer</b>                     |         |                  | $P_{\text{interaction}} = 0.14$      |         |                  | $P_{\text{interaction}} = 0.02$      |
| ≤55 years                              | 105,357 | 83               | 1.17 (0.98 to 1.39)                  | 85,784  | 86               | 1.12 (0.97 to 1.29)                  |
| 56-65 years                            | 100,883 | 288              | 1.13 (1.02 to 1.24)                  | 87,407  | 375              | 1.10 (1.03 to 1.18)                  |
| >65 years                              | 30,426  | 130              | 1.20 (1.03 to 1.40)                  | 30,653  | 255              | 1.05 (0.97 to 1.15)                  |
| <b>Breast cancer / Prostate cancer</b> |         |                  | $P_{\text{interaction}} = 0.96$      |         |                  | $P_{\text{interaction}} = 0.60$      |
| ≤55 years                              | 105,357 | 81               | 1.20 (1.01 to 1.42)                  | 85,784  | 15               | 1.06 (0.72 to 1.55)                  |
| 56-65 years                            | 100,883 | 90               | 1.28 (1.08 to 1.52)                  | 87,407  | 117              | 1.09 (0.96 to 1.24)                  |
| >65 years                              | 30,426  | 33               | 1.19 (0.88 to 1.61)                  | 30,653  | 122              | 1.07 (0.95 to 1.21)                  |

Data presented as adjusted hazard ratio (HR) and its 95% confidence interval (95% CI) by 5-kg lower grip strength and age categories. Analysis were adjusted for height, age, sex, education qualifications, deprivation index, ethnicity, month of recruitment, depression, diabetes, hypertension, respiratory disease, CVD, cancer, long-standing illness, BMI categories, smoking, physical activity, discretionary sedentary behaviour, dietary intake (alcohol, fruit and vegetable, oily fish, red meat and processed meat intake).

**Table M.** Association of grip strength with cause-specific incidence by age categories in women and men

|                                        | Women   |                  |                                   | Men     |                  |                                   |
|----------------------------------------|---------|------------------|-----------------------------------|---------|------------------|-----------------------------------|
|                                        | Total N | Number of events | HR (95% CI)                       | Total N | Number of events | HR (95% CI)                       |
| <b>CVD</b>                             |         |                  | P <sup>-interaction</sup> <0.001  |         |                  | P <sup>-interaction</sup> <0.001  |
| ≤55 years                              | 110,367 | 2,808            | 1.19 (1.15 to 1.22)               | 85,625  | 3,914            | 1.15 (1.12 to 1.17)               |
| 56-65 years                            | 108,522 | 5,759            | 1.15 (1.13 to 1.18)               | 84,352  | 8,559            | 1.12 (1.11 to 1.14)               |
| >65 years                              | 32,466  | 2,804            | 1.15 (1.12 to 1.19)               | 28,576  | 4,215            | 1.11 (1.08 to 1.13)               |
| <b>Respiratory System</b>              |         |                  | P <sup>-interaction</sup> = 0.14  |         |                  | P <sup>-interaction</sup> = 0.11  |
| ≤55 years                              | 111,048 | 1,364            | 1.21 (1.16 to 1.26)               | 87,598  | 1,259            | 1.19 (1.15 to 1.23)               |
| 56-65 years                            | 110,931 | 2,411            | 1.24 (1.20 to 1.29)               | 92,046  | 2,653            | 1.19 (1.16 to 1.21)               |
| >65 years                              | 34,333  | 1,172            | 1.22 (1.16 to 1.28)               | 33,421  | 1,683            | 1.18 (1.15 to 1.22)               |
| <b>COPD</b>                            |         |                  | P <sup>-interaction</sup> = 0.05  |         |                  | P <sup>-interaction</sup> = 0.007 |
| ≤55 years                              | 111,048 | 99               | 1.31 (1.13 to 1.51)               | 87,598  | 90               | 1.24 (1.11 to 1.39)               |
| 56-65 years                            | 110,931 | 255              | 1.19 (1.08 to 1.32)               | 92,046  | 326              | 1.19 (1.12 to 1.27)               |
| >65 years                              | 34,333  | 131              | 1.21 (1.05 to 1.39)               | 33,421  | 230              | 1.13 (1.04 to 1.23)               |
| <b>All cancer</b>                      |         |                  | P <sup>-interaction</sup> = 0.001 |         |                  | P <sup>-interaction</sup> <0.001  |
| ≤55 years                              | 105,357 | 3,743            | 1.13 (1.10 to 1.16)               | 85,784  | 2,363            | 1.10 (1.06 to 1.13)               |
| 56-65 years                            | 100,883 | 6,926            | 1.11 (1.09 to 1.14)               | 87,407  | 7,636            | 1.08 (1.07 to 1.10)               |
| >65 years                              | 30,426  | 2,833            | 1.12 (1.09 to 1.16)               | 30,653  | 4,203            | 1.07 (1.05 to 1.09)               |
| <b>Colorectal cancer</b>               |         |                  | P <sup>-interaction</sup> = 0.32  |         |                  | P <sup>-interaction</sup> = 0.11  |
| ≤55 years                              | 105,357 | 245              | 1.17 (1.06 to 1.30)               | 85,784  | 257              | 1.09 (1.00 to 1.20)               |
| 56-65 years                            | 100,883 | 552              | 1.07 (1.00 to 1.15)               | 87,407  | 797              | 1.11 (1.06 to 1.17)               |
| >65 years                              | 30,426  | 286              | 1.11 (1.00 to 1.23)               | 30,653  | 474              | 1.08 (1.02 to 1.15)               |
| <b>Lung cancer</b>                     |         |                  | P <sup>-interaction</sup> = 0.03  |         |                  | P <sup>-interaction</sup> = 0.002 |
| ≤55 years                              | 105,357 | 139              | 1.17 (1.03 to 1.34)               | 85,784  | 115              | 1.14 (1.01 to 1.28)               |
| 56-65 years                            | 100,883 | 444              | 1.15 (1.07 to 1.25)               | 87,407  | 519              | 1.11 (1.04 to 1.17)               |
| >65 years                              | 30,426  | 196              | 1.14 (1.00 to 1.29)               | 30,653  | 328              | 1.03 (0.96 to 1.11)               |
| <b>Breast cancer / Prostate cancer</b> |         |                  | P <sup>-interaction</sup> = 0.07  |         |                  | P <sup>-interaction</sup> = 0.01  |
| ≤55 years                              | 105,357 | 1,559            | 1.09 (1.05 to 1.14)               | 85,784  | 398              | 1.08 (1.00 to 1.16)               |
| 56-65 years                            | 100,883 | 2,171            | 1.10 (1.07 to 1.15)               | 87,407  | 1,933            | 1.06 (1.03 to 1.09)               |
| >65 years                              | 30,426  | 622              | 1.09 (1.01 to 1.17)               | 30,653  | 918              | 1.06 (1.01 to 1.11)               |

Data presented as adjusted hazard ratio (HR) and its 95% confidence interval (95% CI) by 5-kg lower grip strength and age categories. Analysis were adjusted for height, age, sex, education qualifications, deprivation index, ethnicity, month of recruitment, depression, diabetes, hypertension, respiratory disease, CVD, cancer, long-standing illness, BMI categories, smoking, physical activity, discretionary sedentary behaviour, dietary intake (alcohol, fruit and vegetable, oily fish, red meat and processed meat intake).

**Table N.** Association of grip strength with all- and cause-specific mortality by age categories in women and men with landmark analysis

|                                        | Women   |                  |                                      | Men     |                  |                                      |
|----------------------------------------|---------|------------------|--------------------------------------|---------|------------------|--------------------------------------|
|                                        | Total N | Number of deaths | HR (95% CI) 5-kg lower grip strength | Total N | Number of deaths | HR (95% CI) 5-kg lower grip strength |
| <b>All-cause Mortality</b>             |         |                  | P <sup>-interaction</sup> <0.001     |         |                  | P <sup>-interaction</sup> = 0.03     |
| ≤55 years                              | 88,367  | 1,344            | 1.22 (1.18 to 1.26)                  | 111,904 | 1,073            | 1.23 (1.17 to 1.28)                  |
| 56-65 years                            | 94,079  | 3,967            | 1.18 (1.16 to 1.21)                  | 112,939 | 2,651            | 1.19 (1.15 to 1.23)                  |
| >65 years                              | 34,565  | 2,780            | 1.17 (1.14 to 1.20)                  | 35,220  | 1,507            | 1.22 (1.17 to 1.27)                  |
| <b>CVD</b>                             |         |                  | P <sup>-interaction</sup> = 0.79     |         |                  | P <sup>-interaction</sup> <0.001     |
| ≤55 years                              | 110,367 | 168              | 1.18 (1.05 to 1.33)                  | 85,625  | 348              | 1.30 (1.22 to 1.39)                  |
| 56-65 years                            | 108,522 | 502              | 1.17 (1.09 to 1.26)                  | 84,352  | 1,011            | 1.25 (1.21 to 1.30)                  |
| >65 years                              | 32,466  | 326              | 1.27 (1.15 to 1.39)                  | 28,576  | 678              | 1.19 (1.13 to 1.25)                  |
| <b>Respiratory System</b>              |         |                  | P <sup>-interaction</sup> = 0.06     |         |                  | P <sup>-interaction</sup> <0.001     |
| ≤55 years                              | 111,048 | 101              | 1.42 (1.23 to 1.63)                  | 87,598  | 161              | 1.32 (1.21 to 1.44)                  |
| 56-65 years                            | 110,931 | 344              | 1.30 (1.19 to 1.41)                  | 92,046  | 638              | 1.31 (1.25 to 1.38)                  |
| >65 years                              | 34,333  | 245              | 1.35 (1.21 to 1.50)                  | 33,421  | 573              | 1.21 (1.15 to 1.28)                  |
| <b>COPD</b>                            |         |                  | P <sup>-interaction</sup> = 0.88     |         |                  | P <sup>-interaction</sup> = 0.001    |
| ≤55 years                              | 111,048 | 13               | 1.38 (0.93 to 2.05)                  | 87,598  | 14               | 1.46 (1.12 to 1.90)                  |
| 56-65 years                            | 110,931 | 51               | 1.13 (0.91 to 1.41)                  | 92,046  | 106              | 1.30 (1.16 to 1.45)                  |
| >65 years                              | 34,333  | 36               | 1.46 (1.11 to 1.93)                  | 33,421  | 110              | 1.15 (1.02 to 1.30)                  |
| <b>All cancer</b>                      |         |                  | P <sup>-interaction</sup> = 0.03     |         |                  | P <sup>-interaction</sup> = 0.003    |
| ≤55 years                              | 105,357 | 470              | 1.19 (1.11 to 1.28)                  | 85,784  | 485              | 1.13 (1.07 to 1.20)                  |
| 56-65 years                            | 100,883 | 1,238            | 1.18 (1.13 to 1.24)                  | 87,407  | 1,707            | 1.13 (1.09 to 1.16)                  |
| >65 years                              | 30,426  | 672              | 1.15 (1.08 to 1.23)                  | 30,653  | 1,166            | 1.11 (1.07 to 1.15)                  |
| <b>Colorectal cancer</b>               |         |                  | P <sup>-interaction</sup> = 0.97     |         |                  | P <sup>-interaction</sup> = 0.58     |
| ≤55 years                              | 105,357 | 48               | 1.15 (0.91 to 1.46)                  | 85,784  | 71               | 1.11 (0.94 to 1.32)                  |
| 56-65 years                            | 100,883 | 112              | 1.26 (1.08 to 1.48)                  | 87,407  | 163              | 1.19 (1.08 to 1.32)                  |
| >65 years                              | 30,426  | 65               | 1.11 (0.90 to 1.38)                  | 30,653  | 102              | 1.26 (1.11 to 1.43)                  |
| <b>Lung cancer</b>                     |         |                  | P <sup>-interaction</sup> = 0.14     |         |                  | P <sup>-interaction</sup> = 0.02     |
| ≤55 years                              | 105,357 | 83               | 1.17 (0.98 to 1.39)                  | 85,784  | 86               | 1.12 (0.97 to 1.29)                  |
| 56-65 years                            | 100,883 | 288              | 1.13 (1.02 to 1.24)                  | 87,407  | 375              | 1.10 (1.03 to 1.18)                  |
| >65 years                              | 30,426  | 130              | 1.20 (1.03 to 1.40)                  | 30,653  | 255              | 1.05 (0.97 to 1.15)                  |
| <b>Breast cancer / Prostate cancer</b> |         |                  | P <sup>-interaction</sup> = 0.96     |         |                  | P <sup>-interaction</sup> = 0.60     |
| ≤55 years                              | 105,357 | 81               | 1.20 (1.01 to 1.42)                  | 85,784  | 15               | 1.06 (0.72 to 1.55)                  |
| 56-65 years                            | 100,883 | 90               | 1.28 (1.08 to 1.52)                  | 87,407  | 117              | 1.09 (0.96 to 1.24)                  |
| >65 years                              | 30,426  | 33               | 1.19 (0.88 to 1.61)                  | 30,653  | 122              | 1.07 (0.95 to 1.21)                  |

Data presented as adjusted hazard ratio (HR) and its 95% confidence interval (95% CI) by 5-kg lower grip strength and age categories. Analysis were adjusted for height, age, sex, education qualifications, deprivation index, ethnicity, month of recruitment, depression, diabetes, hypertension, respiratory disease, CVD, cancer, long-standing illness, BMI categories, smoking, physical activity, discretionary sedentary behaviour, dietary intake (alcohol, fruit and vegetable, oily fish, red meat and processed meat intake). Participants who had events that occurred within the first 2 years of follow up were excluded from the analysis.

**Table O.** Association of grip strength with cause-specific incidence by age categories in women and men with landmark analysis

|                                        | Women   |                  |                                   | Men     |                  |                                    |
|----------------------------------------|---------|------------------|-----------------------------------|---------|------------------|------------------------------------|
|                                        | Total N | Number of events | HR (95% CI)                       | Total N | Number of events | HR (95% CI)                        |
| <b>CVD</b>                             |         |                  | P <sup>-interaction</sup> <0.001  |         |                  | P <sup>-interaction</sup> <0.001   |
| ≤55 years                              | 110,367 | 2,808            | 1.19 (1.15 to 1.22)               | 85,625  | 3,914            | 1.15 (1.12 to 1.17)                |
| 56-65 years                            | 108,522 | 5,759            | 1.15 (1.13 to 1.18)               | 84,352  | 8,559            | 1.12 (1.11 to 1.14)                |
| >65 years                              | 32,466  | 2,804            | 1.15 (1.12 to 1.19)               | 28,576  | 4,215            | 1.11 (1.08 to 1.13)                |
| <b>Respiratory System</b>              |         |                  | P <sup>-interaction</sup> = 0.14  |         |                  | P <sup>-interaction</sup> = 0.11   |
| ≤55 years                              | 111,048 | 1,364            | 1.21 (1.16 to 1.26)               | 87,598  | 1,259            | 1.19 (1.15 to 1.23)                |
| 56-65 years                            | 110,931 | 2,411            | 1.24 (1.20 to 1.29)               | 92,046  | 2,653            | 1.19 (1.16 to 1.22)                |
| >65 years                              | 34,333  | 1,172            | 1.22 (1.16 to 1.28)               | 33,421  | 1,683            | 1.18 (1.15 to 1.22)                |
| <b>COPD</b>                            |         |                  | P <sup>-interaction</sup> = 0.05  |         |                  | P <sup>-interaction</sup> = 0.007  |
| ≤55 years                              | 111,048 | 99               | 1.31 (1.13 to 1.51)               | 87,598  | 90               | 1.24 (1.11 to 1.39)                |
| 56-65 years                            | 110,931 | 255              | 1.19 (1.08 to 1.32)               | 92,046  | 326              | 1.19 (1.12 to 1.27)                |
| >65 years                              | 34,333  | 131              | 1.21 (1.05 to 1.39)               | 33,421  | 230              | 1.13 (1.04 to 1.23)                |
| <b>All cancer</b>                      |         |                  | P <sup>-interaction</sup> = 0.001 |         |                  | P <sup>-interaction</sup> <0.001   |
| ≤55 years                              | 105,357 | 3,743            | 1.13 (1.10 to 1.16)               | 85,784  | 2,363            | 1.10 (1.06 to 1.13)                |
| 56-65 years                            | 100,883 | 6,926            | 1.11 (1.09 to 1.14)               | 87,407  | 7,636            | 1.08 (1.07 to 1.10)                |
| >65 years                              | 30,426  | 2,833            | 1.12 (1.09 to 1.16)               | 30,653  | 4,203            | 1.07 (1.05 to 1.09)                |
| <b>Colorectal cancer</b>               |         |                  | P <sup>-interaction</sup> = 0.32  |         |                  | P <sup>-interaction</sup> = 0.11   |
| ≤55 years                              | 105,357 | 245              | 1.17 (1.06 to 1.30)               | 85,784  | 257              | 1.09 (1.00 to 1.20)                |
| 56-65 years                            | 100,883 | 552              | 1.07 (1.00 to 1.15)               | 87,407  | 797              | 1.11 (1.06 to 1.17)                |
| >65 years                              | 30,426  | 286              | 1.11 (1.00 to 1.23)               | 30,653  | 474              | 1.08 (1.02 to 1.15)                |
| <b>Lung cancer</b>                     |         |                  | P <sup>-interaction</sup> = 0.03  |         |                  | P <sup>-interaction</sup> = 0.002  |
| ≤55 years                              | 105,357 | 139              | 1.17 (1.03 to 1.34)               | 85,784  | 115              | 1.14 (1.01 to 1.28)                |
| 56-65 years                            | 100,883 | 444              | 1.15 (1.07 to 1.25)               | 87,407  | 519              | 1.11 (1.04 to 1.17)                |
| >65 years                              | 30,426  | 196              | 1.14 (1.00 to 1.29)               | 30,653  | 328              | 1.03 (0.96 to 1.11)                |
| <b>Breast cancer / Prostate cancer</b> |         |                  | P <sup>-interaction</sup> = 0.08  |         |                  | P <sup>-interaction</sup> = <0.001 |
| ≤55 years                              | 105,357 | 1,559            | 1.09 (1.05 to 1.14)               | 85,784  | 398              | 1.08 (1.00 to 1.16)                |
| 56-65 years                            | 100,883 | 2,171            | 1.10 (1.07 to 1.15)               | 87,407  | 1,933            | 1.06 (1.03 to 1.09)                |
| >65 years                              | 30,426  | 622              | 1.09 (1.01 to 1.17)               | 30,653  | 918              | 1.06 (1.01 to 1.11)                |

Data presented as adjusted hazard ratio (HR) and its 95% confidence interval (95% CI) by 5-kg lower grip strength and age categories. Analysis were adjusted for height, age, sex, education qualifications, deprivation index, ethnicity, month of recruitment, depression, diabetes, hypertension, respiratory disease, CVD, cancer, long-standing illness, BMI categories, smoking, physical activity, discretionary sedentary behaviour, dietary intake (alcohol, fruit and vegetable, oily fish, red meat and processed meat intake). Participants who had events that occurred within the first 2 years of follow up were excluded from the analysis.

**Table P.** Association of grip strength with all- and cause-specific mortality in women and men by FNII Sarcopenia cut-off points for strength weakness

|                                  | Women   |                  |                     |         | Men     |                  |                     |         |
|----------------------------------|---------|------------------|---------------------|---------|---------|------------------|---------------------|---------|
|                                  | Total N | Number of deaths | HR (95% CI)         | P-value | Total N | Number of deaths | HR (95% CI)         | P-value |
| <b>All-cause</b>                 |         |                  |                     |         |         |                  |                     |         |
| Model 0                          | 260,063 | 5,231            | 1.66 (1.55 to 1.78) | <0.001  | 217,011 | 8,091            | 2.08 (1.95 to 2.22) | <0.001  |
| Model 1                          | 260,063 | 5,231            | 1.67 (1.55 to 1.79) | <0.001  | 217,011 | 8,091            | 2.07 (1.93 to 2.20) | <0.001  |
| Model 2                          | 260,063 | 5,231            | 1.39 (1.29 to 1.50) | <0.001  | 217,011 | 8,091            | 1.80 (1.69 to 1.93) | <0.001  |
| Model 3                          | 260,063 | 5,231            | 1.36 (1.26 to 1.47) | <0.001  | 217,011 | 8,091            | 1.73 (1.62 to 1.86) | <0.001  |
| Model 4                          | 259,240 | 4,408            | 1.39 (1.28 to 1.51) | <0.001  | 215,523 | 6,603            | 1.67 (1.54 to 1.81) | <0.001  |
| <b>CVD</b>                       |         |                  |                     |         |         |                  |                     |         |
| Model 0                          | 251,355 | 996              | 1.73 (1.47 to 2.02) | <0.001  | 198,553 | 2,037            | 2.35 (2.07 to 2.67) | <0.001  |
| Model 1                          | 251,355 | 996              | 1.71 (1.45 to 2.01) | <0.001  | 198,553 | 2,037            | 2.33 (2.04 to 2.65) | <0.001  |
| Model 2                          | 251,355 | 996              | 1.41 (1.19 to 1.67) | <0.001  | 198,553 | 2,037            | 2.04 (1.78 to 2.33) | <0.001  |
| Model 3                          | 251,355 | 996              | 1.36 (1.15 to 1.62) | <0.001  | 198,553 | 2,037            | 1.95 (1.71 to 2.24) | <0.001  |
| Model 4                          | 250,624 | 832              | 1.44 (1.20 to 1.72) | <0.001  | 197,420 | 1,685            | 1.84 (1.58 to 2.14) | <0.001  |
| <b>Respiratory System</b>        |         |                  |                     |         |         |                  |                     |         |
| Model 0                          | 256,312 | 690              | 2.43 (2.04 to 2.90) | <0.001  | 213,065 | 1,372            | 2.66 (2.30 to 2.92) | <0.001  |
| Model 1                          | 256,312 | 690              | 2.40 (2.00 to 2.87) | <0.001  | 213,065 | 1,372            | 2.52 (2.17 to 2.92) | <0.001  |
| Model 2                          | 256,312 | 690              | 1.86 (1.55 to 2.23) | <0.001  | 213,065 | 1,372            | 2.14 (1.84 to 2.49) | <0.001  |
| Model 3                          | 256,312 | 690              | 1.80 (1.50 to 2.16) | <0.001  | 213,065 | 1,372            | 2.03 (1.75 to 2.37) | <0.001  |
| Model 4                          | 255,537 | 603              | 1.73 (1.42 to 2.10) | <0.001  | 211,695 | 1,159            | 1.89 (1.60 to 2.24) | <0.001  |
| <b>COPD</b>                      |         |                  |                     |         |         |                  |                     |         |
| Model 0                          | 256,312 | 100              | 2.67 (1.70 to 4.18) | <0.001  | 213,065 | 230              | 2.52 (1.79 to 3.24) | <0.001  |
| Model 1                          | 256,312 | 100              | 2.43 (1.54 to 3.84) | <0.001  | 213,065 | 230              | 2.28 (1.61 to 3.24) | <0.001  |
| Model 2                          | 256,312 | 100              | 1.70 (1.07 to 2.69) | 0.02    | 213,065 | 230              | 1.85 (1.30 to 2.63) | <0.001  |
| Model 3                          | 256,312 | 100              | 1.56 (1.03 to 2.46) | 0.01    | 213,065 | 230              | 1.67 (1.17 to 2.38) | <0.001  |
| Model 4                          | 255,537 | 89               | 1.46 (1.02 to 2.09) | 0.04    | 211,695 | 196              | 1.43 (1.01 to 2.02) | 0.05    |
| <b>All cancer</b>                |         |                  |                     |         |         |                  |                     |         |
| Model 0                          | 236,666 | 2,380            | 1.23 (1.09 to 1.39) | <0.001  | 203,844 | 3,358            | 1.49 (1.28 to 1.63) | <0.001  |
| Model 1                          | 236,666 | 2,380            | 1.28 (1.13 to 1.44) | <0.001  | 203,844 | 3,358            | 1.51 (1.34 to 1.71) | <0.001  |
| Model 2                          | 236,666 | 2,380            | 1.20 (1.07 to 1.36) | 0.002   | 203,844 | 3,358            | 1.44 (1.27 to 1.62) | <0.001  |
| Model 3                          | 236,666 | 2,380            | 1.18 (1.05 to 1.34) | 0.007   | 203,844 | 3,358            | 1.39 (1.18 to 1.53) | <0.001  |
| Model 4                          | 236,187 | 2,113            | 1.22 (1.07 to 1.39) | 0.003   | 202,776 | 2,920            | 1.34 (1.17 to 1.54) | <0.001  |
| <b>Colorectal cancer</b>         |         |                  |                     |         |         |                  |                     |         |
| Model 0                          | 236,666 | 225              | 1.17 (0.78 to 1.76) | 0.44    | 203,844 | 336              | 1.83 (1.27 to 2.63) | 0.001   |
| Model 1                          | 236,666 | 225              | 1.25 (0.83 to 1.89) | 0.27    | 203,844 | 336              | 1.96 (1.35 to 2.83) | <0.001  |
| Model 2                          | 236,666 | 225              | 1.21 (0.80 to 1.84) | 0.35    | 203,844 | 336              | 1.91 (1.32 to 2.77) | 0.001   |
| Model 3                          | 236,666 | 225              | 1.19 (0.79 to 1.81) | 0.39    | 203,844 | 336              | 1.95 (1.34 to 2.83) | <0.001  |
| Model 4                          | 236,187 | 206              | 1.14 (0.73 to 1.78) | 0.56    | 202,776 | 295              | 2.06 (1.39 to 3.06) | <0.001  |
| <b>Lung cancer</b>               |         |                  |                     |         |         |                  |                     |         |
| Model 0                          | 236,666 | 501              | 1.05 (0.78 to 1.37) | 0.74    | 203,844 | 716              | 1.35 (1.05 to 1.75) | 0.02    |
| Model 1                          | 236,666 | 501              | 1.03 (0.78 to 1.36) | 0.80    | 203,844 | 716              | 1.39 (1.07 to 1.80) | 0.01    |
| Model 2                          | 236,666 | 501              | 0.94 (0.71 to 1.23) | 0.65    | 203,844 | 716              | 1.29 (1.01 to 1.65) | 0.05    |
| Model 3                          | 236,666 | 501              | 0.92 (0.70 to 1.22) | 0.61    | 203,844 | 716              | 1.23 (0.94 to 1.59) | 0.12    |
| Model 4                          | 236,187 | 428              | 1.05 (0.78 to 1.41) | 0.74    | 202,776 | 614              | 1.21 (0.91 to 1.61) | 0.19    |
| <b>Breast / Prostate cancer*</b> |         |                  |                     |         |         |                  |                     |         |
| Model 0                          | 236,666 | 204              | 1.52 (1.00 to 2.31) | 0.05    | 203,844 | 254              | 1.10 (0.68 to 1.77) | 0.68    |
| Model 1                          | 236,666 | 204              | 1.65 (1.08 to 2.52) | 0.02    | 203,844 | 254              | 1.18 (0.73 to 1.91) | 0.47    |
| Model 2                          | 236,666 | 204              | 1.55 (1.01 to 2.39) | 0.04    | 203,844 | 254              | 1.22 (0.75 to 1.97) | 0.51    |
| Model 3                          | 236,666 | 204              | 1.54 (1.00 to 2.36) | 0.05    | 203,844 | 254              | 1.18 (0.73 to 1.91) | 0.49    |
| Model 4                          | 236,187 | 191              | 1.61 (1.02 to 2.53) | 0.03    | 202,776 | 238              | 1.13 (0.68 to 1.88) | 0.63    |

Data presented as adjusted hazard ratio (HR) and its 95% confidence interval (95% CI) by FNII Sarcopenia cut-off points (reference groups'  $\geq 26.0$  kg and 16.0 kg for men and women, respectively).

Model 0 was adjusted for, age, education qualifications, deprivation index, ethnicity and month of recruitment.

Model 1 was adjusted as in model 0 and for height

Model 2 was adjusted as in model 1 and for depression, diabetes, hypertension, respiratory disease, CVD, cancer and long-standing illness

Model 3 was adjusted as in model 2 and for BMI categories, smoking, physical activity, discretionary sedentary behaviour, dietary intake (alcohol, fruit and vegetable, oily fish, red meat and processed meat intake).

Model 4 was adjusted as in model 3 but participants who had events within the first 2 years of follow up were excluded from the analysis.

\*Hazard ratios estimated for Breast cancer for women and Prostate cancer for men.

**Table Q.** Association of grip strength with cause-specific incidence in women and men by FNIH Sarcopenia cut-off points for strength weakness

|                                  | Women   |                  |                      |         | Men     |                  |                     |         |
|----------------------------------|---------|------------------|----------------------|---------|---------|------------------|---------------------|---------|
|                                  | Total N | Number of events | HR (95% CI)          | P-value | Total N | Number of events | HR (95% CI)         | P-value |
| <b>CVD</b>                       |         |                  |                      |         |         |                  |                     |         |
| Model 0                          | 251,355 | 11,371           | 1.44 (1.37 to 1.52)  | <0.001  | 198,553 | 16,688           | 1.45 (1.37 to 1.54) | <0.001  |
| Model 1                          | 251,355 | 11,371           | 1.50 (1.43 to 1.58)  | <0.001  | 198,553 | 16,688           | 1.51 (1.42 to 1.59) | <0.000  |
| Model 2                          | 251,355 | 11,371           | 1.33 (1.26 to 1.40)  | <0.001  | 198,553 | 16,688           | 1.40 (1.32 to 1.48) | <0.001  |
| Model 3                          | 251,355 | 11,371           | 1.30 (1.23 to 1.36)  | <0.001  | 198,553 | 16,688           | 1.38 (1.30 to 1.47) | <0.001  |
| Model 4                          | 250,624 | 11,157           | 1.30 (1.23 to 1.38)  | <0.001  | 197,420 | 16,275           | 1.36 (1.28 to 1.44) | <0.001  |
| <b>Respiratory System</b>        |         |                  |                      |         |         |                  |                     |         |
| Model 0                          | 256,312 | 4,947            | 2.13 (1.98 to 2.28)  | <0.001  | 213,065 | 5,595            | 2.15 (1.98 to 2.33) | <0.001  |
| Model 1                          | 256,312 | 4,947            | 1.69 (1.57 to 1.82)  | <0.001  | 213,065 | 5,595            | 2.12 (1.95 to 2.30) | <0.001  |
| Model 2                          | 256,312 | 4,947            | 1.63 (1.52 to 1.76)  | <0.001  | 213,065 | 5,595            | 1.79 (1.65 to 1.94) | <0.001  |
| Model 3                          | 256,312 | 4,947            | 1.63 (1.51 to 1.75)  | <0.001  | 213,065 | 5,595            | 1.73 (1.59 to 1.88) | <0.001  |
| Model 4                          | 255,537 | 4,810            | 1.62 (1.50 to 1.74)  | <0.001  | 211,695 | 5,295            | 1.69 (1.55 to 1.84) | <0.001  |
| <b>COPD</b>                      |         |                  |                      |         |         |                  |                     |         |
| Model 0                          | 256,312 | 485              | 2.37 (1.93 to 2.93)  | <0.001  | 213,065 | 646              | 2.14 (1.72 to 2.66) | <0.001  |
| Model 1                          | 256,312 | 485              | 2.15 (1.74 to 2.66)  | <0.001  | 213,065 | 646              | 1.98 (1.28 to 2.47) | <0.001  |
| Model 2                          | 256,312 | 485              | 1.53 (1.24 to 1.90)  | <0.001  | 213,065 | 646              | 1.60 (1.28 to 2.00) | <0.001  |
| Model 3                          | 256,312 | 485              | 1.47 (1.18 to 1.82)  | <0.001  | 213,065 | 646              | 1.49 (1.19 to 1.87) | <0.001  |
| Model 4                          | 255,537 | 473              | 1.45 (1.17 to 1.80)  | <0.001  | 211,695 | 604              | 1.38 (1.09 to 1.75) | 0.008   |
| <b>All cancer</b>                |         |                  |                      |         |         |                  |                     |         |
| Model 0                          | 236,666 | 13,502           | 1.17 (1.11 to 1.23)  | <0.001  | 203,844 | 14,202           | 1.21 (1.13 to 1.29) | <0.001  |
| Model 1                          | 236,666 | 13,502           | 1.22 (1.16 to 1.29)  | <0.001  | 203,844 | 14,202           | 1.27 (1.19 to 1.35) | <0.001  |
| Model 2                          | 236,666 | 13,502           | 1.21 (1.14 to 1.27)  | <0.001  | 203,844 | 14,202           | 1.24 (1.16 to 1.32) | <0.001  |
| Model 3                          | 236,666 | 13,502           | 1.20 (1.13 to 1.27)  | <0.001  | 203,844 | 14,202           | 1.24 (1.16 to 1.33) | <0.001  |
| Model 4                          | 236,187 | 13,229           | 1.21 (1.14 to 1.28)  | <0.001  | 202,776 | 13,754           | 1.23 (1.15 to 1.31) | <0.001  |
| <b>Colorectal cancer</b>         |         |                  |                      |         |         |                  |                     |         |
| Model 0                          | 236,666 | 1,083            | 1.06 (0.87 to 1.28)  | 0.55    | 203,844 | 1,528            | 1.30 (1.07 to 1.57) | <0.001  |
| Model 1                          | 236,666 | 1,083            | 1.11 (0.92 to 1.35)  | 0.26    | 203,844 | 1,528            | 1.33 (1.09 to 1.61) | <0.001  |
| Model 2                          | 236,666 | 1,083            | 1.13 (0.93 to 1.37)  | 0.20    | 203,844 | 1,528            | 1.33 (1.10 to 1.62) | 0.004   |
| Model 3                          | 236,666 | 1,083            | 1.12 (0.92 to 1.36)  | 0.25    | 203,844 | 1,528            | 1.36 (1.11 to 1.65) | 0.002   |
| Model 4                          | 236,187 | 1,062            | 1.11 (0.91 to 1.35)  | 0.30    | 202,776 | 1,478            | 1.37 (1.12 to 1.67) | 0.002   |
| <b>Lung cancer</b>               |         |                  |                      |         |         |                  |                     |         |
| Model 0                          | 236,666 | 779              | 1.04 (0.79 to 1.37)  | 0.75    | 203,844 | 962              | 1.36 (1.05 to 1.75) | 0.02    |
| Model 1                          | 236,666 | 779              | 1.03 (0.78 to 1.36)  | 0.81    | 203,844 | 962              | 1.39 (1.08 to 1.80) | 0.01    |
| Model 2                          | 236,666 | 779              | 0.94 (0.71 to 1.23)  | 0.65    | 203,844 | 962              | 1.29 (1.00 to 1.66) | 0.05    |
| Model 3                          | 236,666 | 779              | 0.92 (0.70 to 1.22)  | 0.61    | 203,844 | 962              | 1.23 (0.94 to 1.59) | 0.12    |
| Model 4                          | 236,187 | 704              | 1.05 (0.78 to 1.41)  | 0.74    | 202,776 | 852              | 1.21 (0.91 to 1.61) | 0.19    |
| <b>Breast / Prostate cancer*</b> |         |                  |                      |         |         |                  |                     |         |
| Model 0                          | 236,666 | 4,352            | 1.11 (1.01 to 1.220) | 0.04    | 203,844 | 3,249            | 1.05 (0.90 to 1.21) | 0.53    |
| Model 1                          | 236,666 | 4,352            | 1.18 (1.07 to 1.30)  | 0.001   | 203,844 | 3,249            | 1.08 (0.94 to 1.25) | 0.27    |
| Model 2                          | 236,666 | 4,352            | 1.17 (1.06 to 1.30)  | 0.002   | 203,844 | 3,249            | 1.13 (0.98 to 1.28) | 0.16    |
| Model 3                          | 236,666 | 4,352            | 1.17 (1.06 to 1.30)  | 0.002   | 203,844 | 3,249            | 1.13 (0.98 to 1.31) | 0.09    |
| Model 4                          | 236,187 | 4,337            | 1.18 (1.07 to 1.30)  | 0.001   | 202,776 | 3,229            | 1.12 (0.97 to 1.30) | 0.12    |

Data presented as adjusted hazard ratio (HR) and its 95% confidence interval (95% CI) by FNIH Sarcopenia cut-off points (reference groups'  $\geq 26.0$  kg and  $16.0$  kg for men and women, respectively).

Model 0 was adjusted for, age, education qualifications, deprivation index, ethnicity and month of recruitment.

Model 1 was adjusted as in model 0 and for height

Model 2 was adjusted as in model 1 and for depression, diabetes, hypertension, respiratory disease, CVD, cancer and long-standing illness

Model 3 was adjusted as in model 2 and for BMI categories, smoking, physical activity, discretionary sedentary behaviour, dietary intake (alcohol, fruit and vegetable, oily fish, red meat and processed meat intake).

Model 4 was adjusted as in model 3 but participants who had events within the first 2 years of follow up were excluded from the analysis.

\*Hazard ratios estimated for Breast cancer for women and Prostate cancer for men.

**Table R.** Comparison of the Cox-proportional hazard ratios for incident CVD and CVD and all-cause mortality associated with handgrip strength, systolic blood pressure and physical activity

|                            | <b>HR (95% CI)</b>  | <b>P-value</b> |
|----------------------------|---------------------|----------------|
| <b>All-cause mortality</b> |                     |                |
| Handgrip strength          | 1.52 (1.49 to 1.56) | <0.001         |
| Systolic blood pressure    | 1.04 (1.01 to 1.07) | 0.04           |
| Total physical activity    | 1.04 (1.02 to 1.06) | 0.01           |
| <b>CVD mortality</b>       |                     |                |
| Handgrip strength          | 1.59 (1.45 to 1.75) | <0.001         |
| Systolic blood pressure    | 1.24 (1.17 to 1.33) | <0.001         |
| Total physical activity    | 1.05 (1.01 to 1.09) | 0.02           |
| <b>CVD incidence</b>       |                     |                |
| Handgrip strength          | 1.29 (1.25 to 1.32) | <0.001         |
| Systolic blood pressure    | 1.29 (1.25 to 1.32) | <0.001         |
| Total physical activity    | 0.98 (0.95 to 1.01) | 0.06           |

Data presented as adjusted HR and their 95% CI per 1-SD reduction in handgrip strength (kg), and total physical activity (log MET.min.week<sup>-1</sup>), and increase in blood pressure (mmHg). Analyses were adjusted for month of recruitment, height, age, sex, deprivation index, ethnicity, comorbidities (depression, diabetes, hypertension, long standing illness, respiratory diseases, cancer and CVD when this was not used as main outcome), BMI categories, smoking, sedentary behaviour, and dietary intake (alcohol, fruit and vegetable, oily fish, red meat and processed meat intake). SD: standard deviation, HR: hazard ratio.
